# **Sex-biased genes expressed in the cricket brain evolve rapidly**

Authors: Carrie A. Whittle<sup>1</sup>, Arpita Kulkarni<sup>1,2</sup>, Cassandra G. Extavour<sup>1,3</sup>

<sup>1</sup>Department of Organismic and Evolutionary Biology, Harvard University, 16 Divinity Avenue, Cambridge MA 02138, USA

<sup>2</sup>Department of Molecular and Cellular Biology, Harvard University, 16 Divinity Avenue, Cambridge MA 02138, USA

Corresponding author: Cassandra G. Extavour

Email: [extavour@oeb.harvard.edu](mailto:extavour@oeb.harvard.edu)

Phone: (617) 496 1935

Fax: (617) 496 9507

# Abstract

## Background

Sex-biased gene expression, particularly male-biased expression in the gonad, has often been linked to rapid protein sequence evolution (dN/dS) in animals. This evolutionary trend may arise from one or both of sexual selection pressures during mating or low pleiotropy. In insects, research on sex-biased transcription and dN/dS remains largely focused on a few holometabolous species, with variable findings on male and female gonadal effects. The brain is central to the mating process, and provides neurological foundation for mating behaviors, such as courtship, intrasex competition and mate choice. However, there is a striking paucity of research on sex-biased expression of genes in the brain and the rate of protein sequence evolution in such genes.

## Results

Here, we studied sex-biased gene expression in a hemimetabolous insect, the cricket *Gryllus bimaculatus*. We generated novel RNA-seq data for two sexual tissue types, the gonad and somatic reproductive system, and for two core components of the nervous system, the brain and ventral nerve cord. From a genome-wide analysis of genes expressed in these tissues, we report the accelerated evolution of testis-biased genes and seminal fluid proteins (SFPs) genes, as compared to ovary-biased and unbiased genes in this cricket model, which includes an elevated frequency of positive selection events. With respect to the brain, while sex-biased brain genes were much less common than for the gonads, they exhibited exceptionally rapid evolution, an effect that was stronger for the female than for the male brain. Certain sex-biased brain genes were predicted to be involved in mating or sex-related functions, which we suggest may cause exposure to sexual selection. Moreover, the sex-biased brain genes exhibited remarkably low cross-tissue expression breadth, or pleiotropy. We speculate that this feature may permit relaxed purifying selection, and allow the freedom for adaptive protein functional changes in these brain-expressed genes.

## Conclusions

Our results demonstrate that sex-biased expression in the male gonad, and sex-biased gene expression in the brain, especially the female brain, are associated with rapid protein sequence evolution in a cricket model system. We discuss the results with respect to our findings on pleiotropy and positive selection, and consider the potential role of the dynamic mating biology of this cricket model in shaping these patterns.

49    Keywords: *Gryllus*, sex-biased expression, dN/dS, pleiotropy, gonad, brain, mating biology

## Background

Sexual dimorphism in animals is thought to be driven by differential gene expression, as most genes are common to both sexes [1-3]. Sex-biased gene expression, and particularly male-biased gene expression, has been widely linked to rapid protein sequence evolution in studied animals (reviewed by [1-3]). In the insects, studies have largely focused on the holometabolous insect *Drosophila*, and have repeatedly shown the rapid evolution (high nonsynonymous to synonymous substitution rates, dN/dS) of male-biased genes, particularly those from the male sex cells or gonads, as compared to their female counterparts and/or to sexually unbiased genes [1, 4-11] (but see also [12]). This pattern was also recently observed in red flour beetles (*T. castaneum*) [13]. The rapid divergence of male-biased genes has been proposed to be due to adaptive changes in amino acids arising from sexual selection pressures including male-male and sperm competition [4, 14-16], but could also reflect low pleiotropy that may relax purifying selection [7, 10, 17-19]. Nonetheless, despite a persistent pattern of accelerated evolution of male-biased genes, an opposite pattern of rapid evolution of female-biased, including ovary-biased, genes has been found in some holometabolous insects, namely mosquitoes (*Aedes*, *Anopheles*) [20, 21]. This difference from flies may reflect variation in their mating biology, whereby female-female competition for suitable males or male-mate choice may be more common in mosquitoes than in flies [20]. At present however, given the narrow scope of insects studied to date, further investigation of sex-biased expression and protein evolution is warranted, particularly in models outside the Holometabola.

A major understudied structure outside the reproductive system that is highly relevant in terms of sex-biased gene expression and protein evolution is the brain. The brain comprises a major tissue type providing the neurological basis for the mating behaviors of courtship, intrasex competition, mate-choice, and post-mating male-female responses [22-25]. Sex-biased expression *per se* in the brain has been examined in some insects and vertebrates [3, 5, 22, 23, 25-32]. Further, in *Drosophila*, analyses of a small number of neural genes have been found to be directly connected to mating functions and behaviors [33-35]. However, there is a striking paucity of data on the relationship between sex-biased expression in the brain and protein sequence evolution [22]. Moreover, the minimal research available from birds, humans and flies have suggested different types of male and female effects on rates of protein evolution, depending on the system [23, 29, 32] (see also some brain-related and composite-tissue analyses

[36, 37]), and the causes of those patterns remain poorly understood. It is therefore evident that additional study is needed of sex-biased brain expression and its relationship to molecular evolution.

An insect model system that offers significant opportunities to address these problems is the cricket system *Gryllus* (Order Orthoptera). *Gryllus* is a hemimetabolous insect, and thus phylogenetically in an outgroup order (Orthoptera) to the Holometabola [38]. The two-spotted cricket *G. bimaculatus* in particular has emerged as a significant insect model in biology, including for genetics, neuroscience and germ line establishment and development [39]. In fact, many of the developmental mechanisms of *G. bimaculatus* appear more typical of arthropods than the widely studied, and relatively derived, model *Drosophila melanogaster* [40, 41]. Moreover, many aspects of its mating biology are currently well understood. *G. bimaculatus* exhibits intense male-male and sperm competition, including aggressive male-male fighting and mate guarding [42, 43], increased rates of male transfer of spermatophores to females in the presence of other males [44], and the complete mixing of sperm from multiple males in the storage organ of the female reproductive tract, the spermathecae [45, 46]. In addition, females have shown preferences for novel and young mating partners [47], and for males with larger body size and higher quality auditory signals [47, 48]. Females also exhibit a post-mating behaviour of removing spermatophores of non-favored males from their reproductive tract [46], suggesting a propensity for female-mate choice in this organism. Moreover, in terms of the brain, experiments in *G. bimaculatus* have shown that the brain is directly involved in male mating behaviors such as courtship, copulation, spermatophore protrusion, mating intervals and male-female auditory mating signalling [49-51]. The study of *Gryllus* therefore provides a valuable avenue to advance our knowledge of sex-biased expression in reproductive and brain tissues, including relationships to dN/dS and pleiotropy, in a taxon having well-studied mating biology.

Here, we rigorously assess sex-biased gene expression for two tissue types from the reproductive system (gonad and somatic reproductive system) and from the nervous system (brain and ventral nerve cord) and their relationships to protein sequence evolution in *G. bimaculatus*. We report that male-biased gene expression in the gonad is linked to rapid protein sequence evolution, including seminal fluid proteins (SFPs) [52], as compared to unbiased and female-biased genes. However, we observed no significant effect of sex-biased expression in the somatic reproductive system (non-germ line tissues) on dN/dS, despite the roles of these sexual

tissues in male-female interaction, mating and fertilization, and their potential exposure to sexual selection pressures [4, 53-56]. With respect to the brain, we demonstrate that sex-biased genes are uncommon as compared to the gonad, and that these genes typically evolve very rapidly, especially the female-biased brain genes. Further, sex-biased brain genes are conspicuously linked to predicted sex-related functions. The sex-biased brain genes exhibit especially low cross-tissue expression, or pleiotropy, which may in itself accelerate evolution due to relaxed purifying constraint. We propose that this low pleiotropy may also comprise a mechanism potentially allowing greater freedom for these brain-expressed proteins to evolve adaptive functional changes [13, 17-19, 57, 58]. We consider the putative roles of the male and female mating biology of *G. bimaculatus* in shaping the present findings.

## Results and Discussion

The CDS of our main target species *G. bimaculatus* were obtained from its recently available genome [59]. The annotated genome had a total of 17,714 predicted transcripts per gene (longest CDS per gene; [59]). For this gene set, we extracted the CDS with a start codon, no ambiguous nucleotides, and at least 150bp in length. The final list for the present study included a total of 15,539 CDS (mean length=417.0 codons/CDS  $\pm$ 3.5 (standard error)) for *G. bimaculatus*. For analysis of sex-biased gene expression in *G. bimaculatus* we isolated and obtained RNA-seq data for four paired male and female tissue types from adult virgins (Additional file 1: Table S1). The tissues included the gonad (testis for males, ovaries for females), somatic reproductive system, brain and ventral nerve cord (Fig. 1A-F, Additional file 1: Table S1, for read counts). The somatic (non-germ line related) reproductive system herein for males include the pooled vasa deferentia, seminal vesicles and ejaculatory duct, and for females include the spermatheca, common and lateral oviducts, and bursa (Fig. 1A,B; note that a ninth, unpaired, tissue type, the male accessory glands was also isolated and was used in pleiotropy analysis and its own supplementary dN/dS analysis (Fig. 1G), as detailed in Methods). For each tissue, reads were mapped to the entire *G. bimaculatus* CDS list to determine FPKM. We found FPKM was strongly correlated between biological replicates, with Spearman's  $R \geq 0.92$  ( $P < 0.05$ ; Additional file 1: Fig. S1; one exception being the male somatic reproductive system,  $R = 0.71$ ,  $P < 0.05$ ), indicating high reproducibility of results between biological replicates. Sex-biased gene

expression was then determined separately for each of the four paired tissue types using a cut-off of two-fold higher expression in one sex versus the other and  $P < 0.05$  (see Methods).

As shown in Fig. 2, we found that sex-biased gene expression was most common in the gonadal tissues, where 4,822 (31.1%) of all *G. bimaculatus* genes under study were sex-biased in expression: 2,698 (17.4%) and 2,124 (13.7%) genes had ovary-biased and testis-biased expression respectively, and a total of 10,717 (69.0%) were unbiased in expression. By comparison, sex-biased gene expression was markedly less common in the somatic reproductive system, where only 5.6% of genes were sex-biased, with 353 (2.3%) and 520 (3.3%) genes showing female- and male-bias respectively. As compared to the gonad, markedly fewer genes exhibited female-biased and male-biased expression in the neural tissues, where 4.5% of 15,539 *G. bimaculatus* genes had sex-biased expression in the ventral nerve cord: 279 (1.8%) and 425 (2.7%) were female- and male-biased respectively (Fig. 2). For the brain, only 1.0% of genes were sex-biased in expression, with 51 (0.33%) and 106 (0.68%) being female- and male-biased respectively. Together, using the present criteria, it is evident that sex-biased gene expression is most common in the gonad, which is consistent with high phenotypic and transcriptional dimorphism of these sex organs in animals [8, 13, 14, 20, 26, 60-64]. In contrast, sex-biased gene expression is markedly less common in the somatic reproductive system and ventral nerve cord, and least common in the brain of *G. bimaculatus*.

## Molecular evolution of sex-biased genes

We aimed to assess whether and how protein sequence divergence, measured as synonymous to nonsynonymous substitutions, or dN/dS, varied with sex-biased gene expression. Unlike *Drosophila*, *Gryllus* is currently an emerging model genus with few genomic resources outside the aforementioned recent *G. bimaculatus* genome [59]. Thus, to measure dN/dS, we generated and assembled novel RNA-seq data for its sister species *G. assimilis* to obtain a CDS list for that organism (Additional file 1: Table S2). Two-species assessments of dN/dS have been repeatedly shown to be an effective means to study divergence of sex-biased genes (*cf.* [8, 19, 20, 23, 65, 66] including for organisms with few available genomes, as is the case with *Gryllus*. Details of the *G. assimilis* assembly, including BUSCO scores (Seppey, Manni et al. 2019), and ORF predictions [67] are provided in Additional file 1: Text File S1. Following reciprocal BLASTX [68] between *G. bimaculatus* and *G. assimilis* CDS and retention of genes with

unsaturated dN and dS values ( $<1.5$ ) after alignment, we identified 7,220 high confidence *G. bimaculatus*-*G. assimilis* orthologs that were used for all dN/dS analyses. Across all 7,220 orthologs under study, we found that the alignments with gaps removed were on average 68.0% (standard error=0.3) of the original *G. bimaculatus* CDS length (that pre-alignment had an average length of 577.0 codons, standard error=5.9 for the subset of its genes with between-species orthologs), and that the median dN/dS was 0.1152. The median dN was 0.0042 and median dS was 0.0396, values that were substantially  $<1$ , consistent with a close phylogenetic relatedness between these two sister *Gryllus* species from the same genus.

To precisely reveal the relationship between sex-biased gene expression for each individual tissue type and dN/dS, we identified genes that were sex-biased in expression in only one of four of the female-male paired tissues (gonad, somatic reproductive system, brain or ventral nerve cord) and unbiased in all three remaining tissues in *G. bimaculatus*. These genes are hereafter denoted as tissue-specific sex biased, or TSSB genes ( $N_{\text{TSSB}}$  values provided in Additional file 1: Table S3). We also identified those genes with universally unbiased expression in all four tissues types as a control ( $N=3,449$ ; Additional file 1: Table S3). The vast majority of the 7,220 genes (with orthologs in both species) fell into one of these two categories (94.5% of 7,220 genes had TSSB or universally unbiased status).

# ***dN/dS of sex-biased genes in the four tissue types and pleiotropy***

The dN/dS values of sex-biased<sub>TSSB</sub> genes for the four core *Gryllus* tissue types under study, and for universally unbiased genes, are shown in Fig. 3A. In turn, for completeness, the dN/dS values of all sex-biased genes per tissue, regardless of status in other tissues (sex-biased<sub>ALL</sub>), are shown in Fig. 3B. The results show that in this cricket model, testis-biased<sub>TSSB</sub> genes evolved faster than ovary-biased<sub>TSSB</sub> and universally unbiased genes (MWU-tests  $P<0.05$ ). Further, sex-biased brain genes, while uncommon (Fig. 2), evolved exceptionally rapidly, particularly with faster evolution of the female-biased<sub>ALL</sub> brain genes than of unbiased<sub>ALL</sub> genes (MWU-test  $P<0.05$ , Fig. 3B, for details see below section “*Rapid evolution of sex-biased brain genes*”). In turn, no differences in dN/dS of male-biased, female-biased, or unbiased genes from the somatic reproductive system or ventral nerve cords were observed (using TSSB and universally unbiased genes (Fig. 2A) or ALL genes per tissue type (Fig. 3B, MWU-tests  $P>0.05$ ). In this regard, it is evident that sex-biased expression in this cricket system

is associated with rapid evolution of testis-biased genes and of sex-biased brain genes, particularly those with biased expression in the female brain.

We next assessed the expression breadth across tissues (using nine tissues, the eight paired tissues and the male accessory glands, see Methods), as a proxy for pleiotropy, or multifunctionality of a gene, which is thought to strengthen purifying selection and in turn restrict adaptive evolutionary potential [8, 17-20, 57, 58, 69]. Genes were categorized into genes expressed at >5FPKM in 1-2, 3-4, 5-6, 7-9 tissues. As shown in Fig. 4A, when studying all 7,220 genes with high confidence orthologs, we found that the rate of evolution of *Gryllus* genes was strongly inversely correlated with pleiotropy. The slowest rate of evolution was found in genes transcribed in all tissues under study (median dN/dS=0.161), and the fastest rate in genes expressed in one to two tissues (median=0.221, Ranked ANOVA and Dunn's paired contrasts  $P<0.05$ ). Further, as indicated in Fig. 4B, with respect to sex-biased gene expression, we found that testis-biased genes had markedly lower expression breadth than ovary-biased genes and than universally unbiased genes (MWU-tests  $P<0.05$ ), while female-biased brain genes had the smallest median expression breadth of all studied categories, with statistically significantly lower values than universally unbiased genes (MWU-test  $P<0.05$ ). Thus, this suggests a plausible connection between rapid protein evolution of sex-biased genes in the brain and their narrow pleiotropy, either due to relaxed constraint in itself, and/or due to an associated freedom to evolve functional changes under low purifying constraint [8, 17-20, 57, 58, 69]. In sum, the rapid evolution of testis-biased genes (as compared to ovary-biased and unbiased genes) and of sex-biased brain genes may be at least partly be a result of their pleiotropy, and in turn, potential adaptive changes (see evidence in agreement with a pleiotropy-adaptive evolution relationship in the below section “*Evidence of A History of Positive Selection in Sex-Biased Gonadal and Brain Genes*”). In the following sections, we describe in greater detail the sex-biased genes in the brain and in the reproductive system in Fig. 3 and Fig. 4, and consider the putative roles of pleiotropy and positive selection in affecting their molecular evolution.

### **Rapid evolution of sex-biased genes from the brain**

With respect to the brain, female-biased<sub>TSSB</sub> genes had markedly higher median dN/dS values (median=0.295) than male-biased<sub>TSSB</sub> genes (0.203, Fig. 3A), although that contrast was not statistically significant (MWU-test  $P=0.739$ ). This may reflect the low statistical power of

this comparison due to the rarity of genes with brain specific sex-biases in expression (sex-biased<sub>TSSB</sub>, Additional file 1: Table S3). However, when studying all genes with sex-biased<sub>ALL</sub> expression in the brain, regardless of their expression status in other tissues (Fig. 3B), we found that the 20 female-biased<sub>ALL</sub> brain genes had substantially higher median dN/dS values (median=0.245) than the 45 male-biased<sub>ALL</sub> (0.169) and the 7,155 unbiased<sub>ALL</sub> brain-expressed genes (0.115), wherein its contrast to the unbiased set was statistically significant (MWU-test P=0.047). The dN/dS of every sex-biased brain<sub>ALL</sub> gene is shown in Table 1. 11 of the 20 female-biased<sub>ALL</sub> brain genes (Fig. 3B) and 19 of 45 male-biased<sub>ALL</sub> brain genes had dN/dS values more than twice as high (>0.236) as the median observed for universally unbiased genes (median=0.118, Fig. 3A). This suggests that these genes share a strong propensity to evolve rapidly, with the effect being greatest in the female brain (Fig. 3A, Table 1). While the study of protein evolution of sex-biased brain genes (brains *sensu stricto*, rather than simply heads, or pooled brain-eye tissues as considered by previous studies [36, 37]) remains rare, rapid evolution of female-biased brain genes has been reported in some bird embryos [23], and in some autosomal genes in flies [32]. However, an opposite pattern of rapid evolution of male-biased brain genes for several stages of development was reported in humans [29]. The avian result was interpreted as possibly reflecting selective pressures arising from brain-regulated mating behaviors [23]. We suggest that this may also be a main factor contributing to the trend of rapid evolution of sex-biased brain genes here for crickets.

With respect to the ventral nerve cord, while more sex-biased<sub>TSSB</sub> genes were observed than for the brain (greater than seven-fold higher, Additional file 1: Table S3), not even mild differences in dN/dS were observed as a group between male-biased<sub>TSSB</sub> and female-biased<sub>TSSB</sub> genes (Medians= 0.160 and 0.162 respectively, MWU-test P=0.628, Fig. 3). In sum, the results in Fig. 3 indicate that the main effect of sex-biased expression in the nervous system is the rapid divergence of male- and female-biased<sub>ALL</sub> brain genes, with particularly rapid evolution in the female-biased group.

As shown in Table 1, we examined individual GO functions for each female-biased<sub>ALL</sub> and male-biased<sub>ALL</sub> brain gene (Fig. 3B). including the subset that had TSSB status (Fig. 3A, Additional file 1: Additional file 1: Table S3; any brain genes that had the same sex-biased expression status in the gonad are also shown as gonad sex bias “GSB”). For this, we used single-direction BLASTX [68] of the *G. bimaculatus* genome to the well-studied insect model *D.*

*melanogaster* [70] to identify its putative orthologs to be used for functional analysis in the tool DAVID [71] (note that we chose single direction BLASTX for functional analysis, rather than the reciprocal BLASTX approach that was used for *G. bimaculatus*-*G. assimilis* contrasts for dN/dS, as we considered the latter overly conservative for predictive functional analysis, as it might impede detection of putative paralogs to a gene in crickets; see Methods). We found that the predicted functions of female-biased brain genes included involvement in neurotransmission (*AP-1-2beta*), sensory organ development (*crinkled*), apoptosis (*D. melanogaster CG2681*), and DNA binding (*CG11403*) (Table 1). Remarkably, certain brain expressed genes were involved in sexual processes, including multicellular reproduction (*CG10407*), inter-male aggressive behavior (*tramtrack*) and included an ejaculatory bulb protein (*EbpIII*) (Table 1). Each of these genes had exceptionally elevated dN/dS values of 0.460, 0.384 and 0.244 respectively (Table 1), as compared to the median for universally unbiased genes (median=0.118, Fig. 3A). The fastest evolving female-biased brain gene (dN/dS=0.970) was a putative ortholog of *kekkon-3*, a member of a *kekkon* gene family known to be involved in neuron function and differentiation of the central nervous system in flies [72], and conserved in flies and mosquitoes [73]. The rapid evolution of numerous female-biased brain genes in Table 1, combined with their low pleiotropy (Fig. 4), and a propensity for sex-related functions (Table 1) suggest the possibility that they may share a common history of relaxed selection and/or adaptive evolution due to sexual selection pressures in the cricket clade.

Nonetheless, not every female-biased<sub>TSSB</sub> *G. bimaculatus* brain gene evolved rapidly (Table 1). For instance, one highly constrained gene (GBI\_02686-RA, (dN/dS=0 (dN=0 dS=0.041)) was a likely ortholog match to *D. melanogaster crinkled*, which is involved in hearing (vibration sensing) in both flies and vertebrates [74, 75]. We speculate that a history of strong constraint on dN/dS of this female-biased<sub>TSSB</sub> brain gene could reflect an essential role of negative phonotaxis (potentially relevant to avoiding predators [76]), perhaps an effect enhanced in females. However, the sex-biased expression of this putative *crinkled* gene may also suggest it has a sexual role. A fundamental factor underlying male-female attraction in *G. bimaculatus* is song, which is used by males to attract females (positive phonotaxis), and is thought to be regulated by the auditory neural pathways involving the brain [50, 77]. Thus, it is tempting to speculate that the strong purifying selection on this female biased<sub>TSSB</sub> gene could reflect an important role in receiving male auditory signals for courtship and mating. Further studies in

crickets should assess sex-biased gene expression in the brain of males and females from mixed mating populations (virgin males and females were studied herein, see Methods) to identify brain-related auditory genes potentially involved in mating. Additional valuable directions could include study of sex-biased expression in the male and female auditory organs located on the tibia of the forelegs in crickets [76, 77], in the antennae, which are involved in male-female attraction and male-male aggression and contain neurons involved in sex-related pheromonal signalling [74, 78, 79], and in the terminal abdominal ganglion, which has been linked to mating behaviors [50]. Such studies will help further identify and evaluate the evolutionary rates of brain and neural genes linked to mating and sex-related auditory and pheromonal signalling in this taxon.

With regard to the male-biased<sub>ALL</sub> brain genes, a range of predicted functions were observed. For instance, multiple genes were involved in phagocytosis (six of 45 genes), and early embryo development (three genes). In addition, some genes had predicted sexual roles. In particular, a putative *G. bimaculatus* ortholog (GBI\_17358-RA) to a *D. melanogaster* ejaculatory bulb protein *EbpIII* had a dN/dS value of 0.449, which was nearly four-fold higher than the median for universally unbiased genes (0.118, Table 1). This same *EbpIII* related gene (GBI\_17358-RA) was also found to be testis-biased in expression (Table 1), which is consistent with a putative significant role in testicular function in *G. bimaculatus*. As described above, a different *G. bimaculatus* gene (GBI\_17348-RA) that was also an ortholog match to *D. melanogaster EbpIII* was sex-biased in the female-brain (dN/dS=0.243, Table 1), suggesting the possibility that there are two distinct paralogs to this gene, which may have different roles in male and female brains in crickets (note that as the *G. bimaculatus* to *D. melanogaster* BLASTX used for functional analysis was one-directional, and thus more than one cricket gene could match a single *D. melanogaster* gene, see Methods). These two genes matching *EbpIII*, one biased in the male-brain and the other in the female brain, are candidates to be involved in male-female attraction, mating or sexual behaviors. In *D. melanogaster*, while the exact functions of *EbpIII* remains largely unknown, its key predictive classifications include olfactory function, post-mating behavior, and mating plugs (flybase.org, [70]); further suggesting a possible function in male-female brain mediated sexual behaviors in *G. bimaculatus*. We also discovered that the male-biased<sub>ALL</sub> brain genes included a putative ortholog of *Angiotensin converting enzyme*, a gene involved in *D. melanogaster* spermatid nucleus differentiation and sperm

individualization. This gene had a dN/dS value of 0.236, which is double the median of universally unbiased genes (Table 1). In this regard, multiple male-biased brain genes exhibit rapid divergence and thus are candidates to have potential sex-related roles in this taxon.

While the rapid evolution of sex-biased brain genes in Table 1 could partly result from relaxed purifying constraint and neutral protein sequence changes, as suggested by their low pleiotropy (Fig. 4), the low pleiotropy could in principle also act to accelerate protein changes by more readily allowing adaptive functional changes [8, 17-20, 57, 58, 69]. We suggest here that several features of the mating biology of *G. bimaculatus* might cause episodic adaptive evolution and underlie the high dN/dS values observed herein (see also below section “**Evidence of A History of Positive Selection in Sex-Biased Gonadal and Brain Genes**”). For instance, *G. bimaculatus* exhibits aggressive male-male fighting and mate guarding [42, 43] and males transfer larger spermatophores to females when in the company of rival males [44]. Such behaviors are likely mediated by the male brain. This could, in principle, lead to sexual selection pressures on the male-biased brain genes shown in Table 1, which might give rise to adaptive changes in dN/dS. It is also feasible that inter-locus sexual conflict could contribute to rapid evolution of both sets of male- and female-biased brain genes [80-82]. In other words, it is possible that aggressive male-male behaviors in *G. bimaculatus* [42, 43], directed by male-biased brain genes, may negatively affect female fitness. This might be predicted to lead to an adaptive response in female-biased brain genes (e.g., genes regulating the behavior of removal of spermatophores of certain males by females after mating [48]), causing an evolutionary “arms race” that could in principle accelerate evolution of proteins of both types of genes [1, 81]. Taken together, we suggest that there are several plausible mechanisms related to mating biology of this taxon that may underlie the observed patterns for sex-biased brain genes (Table 1), mediated by low pleiotropy and an enhanced potential for adaptive evolution.

## **Rates of Evolution of Sex-biased Genes from the Reproductive System**

### ***Rapid evolution of testis-biased genes***

For the gonads, as shown in Fig. 3A, we found marked differences in dN/dS among sex-biased<sub>TSSB</sub> genes. First, dN/dS decreased progressively from testis-biased<sub>TSSB</sub> (median=0.128), to universally unbiased genes (median=0.118) to ovary-biased genes (median=0.097, each paired

MWU-test  $P < 0.05$ ; see also Fig. 3B). Thus, the rate differences were most marked between testis-biased<sub>TSSB</sub> and ovary-biased<sub>TSSB</sub> genes, with intermediate values for those with universally unbiased expression.

While rapid evolution of whole male- or of testis-related genes versus their female counterparts may have become a largely accepted paradigm for studied animals [1, 2, 83], in insects this notion has been almost entirely based on repeated studies in *Drosophila* [1, 2, 6-8, 11, 14, 15, 19, 61]. Thus, it is worthwhile to consider the present gonadal result from *Gryllus* in the context of the comparable data available from its fellow insects. For example, the pattern in *Gryllus* (Fig. 3) is consistent with observations of rapid evolution of testis-biased and slow evolution of ovary-biased genes in *Drosophila* [7, 11, 14, 61] (see also results in a related fly, [37]). In addition, this pattern also matches our recent results from beetles (*Tribolium castaneum*) that showed rapid evolution of testis-biased genes [13], a taxon which like *Drosophila* species' is polyandrous, and has evidence of pre- and post-mating female choice mechanisms [84]. These collective results in crickets, fruit flies and beetles, however are opposite to the rapid evolution of ovary-biased (or ovary-specific) genes that we previously reported in the mosquitoes *Aedes* and *Anopheles* [20, 21], and thus the former pattern is not universal to insects.

Given that *Gryllus* (Orthoptera) is a distant outgroup to the two Diptera groups (*Drosophila* and *Aedes/Anopheles*) and the Coleoptera (*Tribolium*) [38] it may be suggested, based on the collective anecdotal evidence, that there could be a shared ancestral effect of testis-biased expression in *Drosophila-Tribolium-Gryllus* [1, 13, 14, 60]) and a derived effect of rapid evolution of ovary-biased genes in *Aedes/Anopheles* [20, 21]. Under this hypothesis, the pattern observed for studied *Aedes* and *Anopheles* species would be a derived feature, and could reflect variation in mating biology among these insects. As an example, although like *Drosophila*, *Aedes aegypti* (the species studied in *Aedes* [20] is polyandrous and thus prone to sperm competition, the polyandry is thought to be relatively weak [85]. Further, this mosquito can exhibit intensive male swarming during courtship that may involve female-female mosquito competition and/or male-mate choice [20, 86]. In addition, nonporous mating plugs are formed in the female mosquito reproductive tract after mating, which prevent sperm competition [86] and thus differ both from the mating plugs formed in *Drosophila*, which allows sperm transfer from competitor males [87, 88], and from observations of complete sperm mixing from multiple males

in *Gryllus* [46]. Any of these mating-related features could in principle underlie the relatively faster evolution of ovary-biased than testis-biased genes in mosquitoes [20], and not in the other studied insects. Studies in even more insect models, particularly in monogamous versus polyandrous species [60], and in additional insects with various degrees of male-male or female-female competition and with and without impermeable mating plugs [20], would help elucidate whether and how and why the effects of sex-biased transcription on protein evolution vary among insects.

Functional predictions of testis-biased<sub>TSSB</sub> and ovary-biased<sub>TSSB</sub> genes are shown in Table 2 (using *D. melanogaster* orthologs and GO clustering). Testis-biased<sub>TSSB</sub> genes were predicted to be preferentially involved in cilium functions, potentially reflecting roles in sperm motility [89]. Ovary-biased<sub>TSSB</sub> genes were particularly involved in fundamental processes such as transcription and protein synthesis functions. Thus, the former may be linked to specialized functions of the male gonad, and sperm functionality, while the latter may include genes involved in broader functions in addition to their roles in the female gonad. In terms of GO functions of the universally unbiased genes, these genes were preferentially involved in core cellular and nuclear functions including protein structure (coiled coil), nucleotide binding and splicing (Table S4), differing from more specialized functions of testis-biased genes.

It is worth mentioning that in Fig. 3A, while testis-biased<sub>TSSB</sub> genes had higher dN/dS values than ovary-biased<sub>TSSB</sub> genes and than the universally unbiased genes, they did not exhibit any statistically significant differences with respect to the less common male-biased genes from the three other tissues, including from the brain (MWU-test  $P > 0.05$ ). Significantly, however, given the much greater abundance of testis-biased<sub>TSSB</sub> genes than male-biased<sub>TSSB</sub> genes from other tissues (8- to 65- fold more common, Fig. 2, Additional file 1: Table S3, Fig. 3A), it may be inferred that testis-biased gene expression plays a substantial role in shaping the portion of the genome that is fast evolving in *G. bimaculatus* (as compared to sex-biased genes from other tissues).

### ***Sex-biased gonadal expression in G. assimilis***

While our main target for expression analyses was *G. bimaculatus*, and *G. assimilis* was used primarily as a reference point to measure rates of protein divergence, we considered the degree of conservation of gene expression between the two species for the 7,220 genes with

orthologs for the gonads (which had the largest N values of all tissues, Additional file 1: Table S3). The results are shown in Additional file 1: Fig. S2 and are described in Additional file 1: Text File S1. We observed that the finding of elevated dN/dS of testis-biased versus ovary-biased genes was robust to whether the sex-biased status (testis-biased, ovary-biased) was observed in one species or was conserved both of these species. Thus, testis-biased expression in one species (i.e., *G. bimaculatus*, Additional file 1: Fig. S2) is sufficient to predict elevated pairwise dN/dS.

### ***Lack of different rates of evolution in sex-biased genes from the somatic reproductive system***

In contrast to the gonad, for the sex-biased<sub>TSSB</sub> genes from the somatic reproductive system (N values in Additional file 1: Table S3), no statistically significant differences were observed in dN/dS of male-biased<sub>TSSB</sub> and female-biased<sub>TSSB</sub> genes, nor between those groups and the universally unbiased genes (MWU-tests  $P > 0.05$ , Fig. 3A). This result may be considered surprising, given the roles of these sexual tissues in reproductive success and fitness, particularly for the female tissues (common oviduct, spermathecae, and vagina).

Few comparable insect data of sex-biases in somatic reproductive system tissues are available. Some specific genes involved in the female reproductive tract in *Drosophila* have been linked to rapid and/or adaptive evolution, which may be due to their dynamic roles in receiving and maintaining sperm after mating [54, 55]. However, a separate assessment of genes broadly defined as female reproductive tract proteins in *D. melanogaster* (based on expression data from mixed or mated flies) showed those genes exhibited slow protein evolution (dN/dS), below the genome-wide average [4]. Thus, our results from *Gryllus* (unmated) showing no differences in dN/dS between female-biased<sub>TSSB</sub> somatic reproductive system genes and the universally unbiased genes or the genome as a whole (Fig. 3), differs from those findings in *Drosophila* (note: see below section “Positive Selection Tests in the Sex-biased Gonadal and Brain Genes” which suggests a small number of female somatic reproductive system genes evolve adaptively) [4]. Significantly, it is evident that the lack of effect of sex-biased transcription in the somatic reproductive system stands in contrast to the substantial effects observed for the gonad (Fig. 3).

### ***Rapid divergence of genes from the male accessory glands and seminal fluid proteins***

As a supplementary analysis with respect to the reproductive structures, given that sex-biased genes from the male-accessory glands, including seminal fluid protein (SFPs), have been strongly linked to rapid evolution in species of *Drosophila*, we assessed the evolutionary rates of these genes in *Gryllus*. The results are described in detail in Additional file 1: Text File 1, Table S5 and Table S6. In brief, we show that *G. bimaculatus* genes with expression specific to the male accessory glands (0 FPKM in all eight other tissues studied here) had few orthologs detected (well below the genome-wide average of ortholog detection) in its sister species *G. assimilis*, and in *D. melanogaster*, suggesting a history of rapid evolution potentially so extensive that it prevents protein similarity detection by these methods, and/or a history of lineage-specific gene losses or gains of genes involved in this sexual tissue [4, 90].

Further, for SFPs, we used the recently available list of 134 SFPs for the species *D. melanogaster* (shown in Additional file 1: Table S6, [52]) as a reference, and found that only 20 SFP genes had identifiable putative orthologs in *G. bimaculatus* (14.9%). Only seven of those were included among the subset of 7,220 genes with between-species orthologs in *Gryllus*. The dN/dS values of these seven genes are shown in Table 3; all were above the genome-wide median dN/dS value (0.115, Fig 2A). Positive selection was indicated for the odorant binding SFP protein *Obp56g*, with dN/dS>1 (Table 3). Together, we conclude that the putative SFPs in the crickets studied here have evolved very rapidly, a feature shared with SFPs of *D. melanogaster* [4, 52], and that could be due to their potential subjection to sex-related selection pressures. For instance, in flies SFPs may enhance sperm competitive ability in the female reproductive tract or egg release from the ovary [91, 92], and males may alter relative production of different SFPs when exposed to male rivals [91]. If similar types of mechanisms of sexual selection exist in crickets, then they could contribute to fast evolution of SFP genes. Another potentially significant behavioural factor in *G. bimaculatus*, is the tendency of females to preferentially retain deposited spermatophores of certain (larger) males [46, 48], which comprises a mechanism of female-choice in this species [48]. This behaviour might lead to sexual selection pressures on SFPs contained in those spermatophores, and accelerate their evolution.

## Evidence of A History of Positive Selection in Sex-Biased Gonadal and Brain Genes

Finally, we considered the incidences of positive selection among those genes with between-species *Gryllus* orthologs. The use of  $dN/dS > 1$  is a conservative means to assess adaptive evolution, as positive selection must be frequent enough across all codon sites to be detected. We found that 1.63 % of all the 7,220 *G. bimaculatus*-*G. assimilis* gene orthologs (N=118 genes) showed  $dN/dS > 1$  (retaining only genes where both  $dN$  and  $dS > 0$ ).

We then considered whether  $dN/dS$  values of the sex-biased gonad<sub>TSSB</sub> genes, which had the highest N values of all tissues analysed (Additional file 1: Table S3), were consistent with the aforementioned hypothesis that reduced gene pleiotropy, or expression breadth (and thus purifying selection), may enhance a gene's functional evolvability [8, 13, 17, 19, 57, 58, 69]. We found that the percent of genes with positive selection ( $dN/dS > 1$ ) increased from ovary-biased<sub>TSSB</sub> genes (1.02%, 19 of 1,858) to universally unbiased genes (1.91%, 66 of 3,449) and testis-biased<sub>TSSB</sub> genes (2.09%, 22 of 1,055;  $\chi^2$  P with Yates' correction was  $< 0.05$  for each paired contrast to ovary-biased<sub>TSSB</sub> genes, Table 4). In turn, we assessed gene pleiotropy for each group. Expression breadth of genes decreased from all ovary-biased<sub>TSSB</sub> (average expression breadth of  $7.97 \pm 0.04$  (standard error)), to universally unbiased ( $6.95 \pm 0.05$ ) and to testis-biased<sub>TSSB</sub> genes ( $5.90 \pm 0.18$  tissues; (MWU-tests  $P < 0.001$  for each of three paired contrasts). Strikingly, the differences were even more magnified in the subset of genes with  $dN/dS > 1$  shown in Table 4, with markedly higher average expression breadth (2.5 fold) for ovary-biased<sub>TSSB</sub> ( $6.74 \pm 0.74$ ) than for testis-biased<sub>TSSB</sub> ( $2.73 \pm 0.72$ ) genes ( $\chi^2$   $P < 0.05$ , Table 4). Crucially, these patterns observed using whole-gene  $dN/dS$  values in this cricket system provide empirical support for the theoretical proposition that that the fewer tissues a gene is expressed in, the more its adaptive evolutionary potential may be enhanced, likely by reducing putative constraint imposed by multiple cross-tissue functions [8, 17, 57, 58, 69]. Our data thus specifically show that this hypothesis can apply to sex-biased genes [17].

We further assessed whether there was evidence of positive selection for sex-biased brain genes, which were much less common than those from the gonad (Additional file 1: Table S3, Fig. 2). The only gene with whole-gene  $dN/dS > 1$  ( $= 3.675$ , GBI\_19557-RB, Table 1) was of unknown function and specifically expressed in the male brain (expression breadth=1 tissue). Thus, this result is also concordant with adaptive evolution facilitated by low pleiotropy. The female-biased brain gene with the highest  $dN/dS$  of 0.9735 matched *D. melanogaster kekkon3*. This value near one could suggest a history of neutral evolution, but may also reflect positive

selection at multiple codon sites in that gene; we cannot distinguish between these two possibilities using gene-wide dN/dS.

As a follow-up analysis to gene-wide dN/dS, we examined positive selection among species at specific codon sites using branch-site analysis (with *G. bimaculatus* as the target branch)[93], based on three-way alignments of *G. bimaculatus*, *G. assimilis* and an available cricket outgroup species *L. kohalensis* [59, 94]. The results are described in Additional file 1: Text File S1 and Table S7. It should be emphasized the assessment is highly conservative given it only includes genes with high confidence three-way reciprocal orthologs between species (see Methods). Nonetheless, we found that substantial portion of the male<sub>TSSB</sub>- and female<sub>TSSB</sub>-biased gonadal genes showed positive selection ( $\geq 9.6\%$ ), and that only minor variation was observed between groups, perhaps due to the conserved nature of the analysis (Additional file 1: Table S7). Three sex-biased brain genes that were studied in Table 1 (among ten of the 65 in Table 1 that had three-species orthologs available for analysis, Additional file 1: Table S7) showed positive selection using branch-site analysis (GBI\_05906-RA, GBI\_09477-RB, GBI\_05452-RB, Additional file 1: Table S7). This result is consistent with the hypothesis of a history of adaptive evolution, which may be due to sex-related evolutionary pressures, in the brain (Fig. 3AB).

It is worth noting that for the branch-site analysis, we found that a small subset of genes that were female-biased in the somatic reproductive system (six of 33 genes (18.2%) with three-species orthologs), which includes the reproductive tract and/or spermathecae, tended to evolve adaptively using branch-site analysis (Additional file 1: Table S7). In this context, the result suggests that a small number of female-biased reproductive system genes may evolve adaptively, potentially in response to sexual selection pressures [55, 95], in this cricket taxon. Further studies using more powerful branch-site positive selection tests [93] as more species genomic data emerges, and/or population genetics analysis of frequencies of codon mutations [96], may further reveal the scale of positive selection at specific codon sites in the sex-biased genes from various tissues of this cricket.

## Conclusions

Here, we have conducted a comprehensive assessment of sex-biased gene expression in reproductive and nervous system tissues, and revealed their relationships to rates of protein evolution, in a cricket model system. We have shown rapid evolution of testis-biased genes and

sex-biased brain genes, particularly female-biased brain genes, in *G. bimaculatus* (Fig. 3, Table 1), and suggested how these rates of protein evolution (dN/dS) may be shaped by pleiotropy (Fig. 4). Further, our data suggest a direct link between relaxed purifying constraint and the frequency of adaptive evolution (Table 4). We further suggested that cricket mating biology might underlie putative roles of sexual selection in accelerating evolution of these genes.

Future studies should assess sex-biased gene expression in the brain and gonad of *G. bimaculatus* adult males and females in a courtship environment with male-male rivals, and/or with multiple females exposed to few males (female-female competition) to identify how genes specifically associated distinct mating conditions may have evolved in this taxon. In addition, attaining additional *Gryllus* genomes and/or population data for *G. bimaculatus* to allow the application of MacDonald-Kreitman tests may allow even more powerful positive selection tests [93, 96] for genes linked to the tissues studied herein, particularly for those with small sample sizes such as the brain. Further, studies of sex-biased gene expression different brain regions may also provide insights into male and female differences in protein evolution [97]. A particularly meaningful avenue for future investigations will include the study of sex-biased gene expression in the reproductive and nervous system tissues among insects that have known differences in their mating biology (variation in testis-size, sperm mixing, degree of female-female competition, mate-choice, *cf.* [60]), including among additional species of *Gryllus*, to further decipher how evolutionary rates may be shaped by these various mechanisms of sexual selection across a phylogeny.

## Materials and Methods

### Biological samples and RNA-seq

For our RNA-seq assessment of *G. bimaculatus* we isolated the male and female gonad (testis for males, ovaries for females), somatic reproductive system, brain and ventral nerve cord (Fig. 1, Additional file 1: Table S1; Fig. 1A,B schematic is based on [98] and simplified from Fox 2001; <http://lanwebs.lander.edu/faculty/rsfox/invertebrates/acheta.html>). A ninth, unpaired tissue type, the male accessory gland, was also extracted as a supplementary tissue for study (see section “Rapid divergence of seminal fluid proteins and genes from the male accessory glands”). Because this relatively large glandular sexual tissue (as compared to somatic reproductive system

tissues defined herein, Fig. 1) is directly involved in reproduction, its gene expression has been linked to protein changes (Additional file 1: Table S5) [4, 16, 53], and it provides an additional sexual tissue type for our analysis of cross-tissue expression, or pleiotropy (see section “*dN/dS of sex-biased genes in the four tissue types and pleiotropy*”). Further, we considered that its inclusion in the male somatic reproductive system sample might overwhelm the transcript population of that tissue type upon by RNA-seq, making it incomparable to the female somatic reproductive system.

The rearing of specimens for tissue sampling was as follows: post hatching, wild type *G. bimaculatus* nymphs from a previously laboratory colony inbred for at least 14 years [99] were grown at 29°C until adulthood in well-ventilated plastic cages on a 12 hour day/ 12 hour night cycle [99]. Plastic cages were provided with egg cartons for shelter, and the animals were fed with ground cat food (Purina item model number 178046) and water. Prior to the final nymphal molt, animals were sexed based on the presence (female) or absence (male) of an ovipositor and separated into male and female cages to avoid any mating and thus obtain virgin samples. Dissections were then performed on the unmated adults within a week after their final molt, by briefly anesthetizing the animals on ice for 5-10 minutes prior to dissection. Different tissue types (gonad, somatic reproductive system, brain, ventral nerve cord, male accessory reproductive glands) were dissected per animal using sterile equipment wiped with ethanol and RNaseZap (Ambion, catalog number AM9780), in ice-cold 1x Phosphate Buffer Saline (PBS), and the tissue cleaned of any unwanted contaminating material. Each tissue was then transferred immediately into individual 1.5ml Eppendorf tubes containing 500µl of pre-frozen Trizol (Thermo Fisher, catalog number 15596018) on dry ice, and stored at -80°C until further use. RNA extractions and library processing for RNA-seq were then performed as described previously [13]. The same procedure was conducted for specimens of *G. assimilis*, which was used to obtain for RNA-seq for an assembly to be used for dN/dS analysis (Additional file 1: Table S2; which also included a carcass tissue type, see below section “Assembly of *G. assimilis* RNA-seq data and protein sequence divergence analysis”). The *G. assimilis* eggs were obtained from the Hedwig lab (University of Cambridge, U.K) and reared to adulthood, using the same animal husbandry protocols as published previously for *G. bimaculatus* [40, 100, 101].

The RNA-seq procedures for single-end reads was conducted for each tissue type as described previously [13]. The complete RNA-seq data are available at the Short Read Archive

(SRA) under the project identifier PRJNA564136 (Tables S1, S2). The RNA-seq reads (76bp in length) for each sample were trimmed of adapters and poor quality bases using the program BBduk available from the Joint Genome Institute (<https://jgi.doe.gov/data-and-tools/bbtools/>) using default parameters.

### **CDS of *G. bimaculatus* and sex-biased gene expression**

The expression level per *G. bimaculatus* gene was determined by mapping reads from each RNA-seq dataset per tissue to the full CDS list using Geneious Read Mapper [102], a program we previously found to be as effective as other read mappers (c.f. [13]), to obtain FPKM per gene. To further confirm that FPKM was robust to mapping programs, we compared FPKM values obtained when using mapping from Geneious and other common mappers including Bbmap (<https://jgi.doe.gov/data-and-tools/bbtools/bb-tools-user-guide/bbmap-guide/>) and Bowtie2 [103], which yielded Spearman R correlations in FPKM across all genes of  $R > 0.94$  (e.g., for male 1 brain RNA-seq). Read counts per CDS were converted to FPKM.

Expression level between sexes was compared separately for each tissue-type. We compared expression between males and females for the gonad, somatic reproductive system, brain, and ventral nerve cord across replicates using the program Deseq2 to obtain P-values [104]. The degree of sex-biased expression was obtained using the ratio of average FPKM of the replicates for female and male tissues. Any genes having a two-fold or greater ratio in average expression in one sex and a statistically significant P-value ( $P < 0.05$ ) as well as a FPKM of at least 1 in one tissue type was defined as sex-biased [13, 19, 20]. All other genes were defined as unbiased.

### **Assembly of *G. assimilis* RNA-seq data and protein sequence divergence analysis**

To study dN/dS, we generated and assembled RNA-seq CDS for the *G. bimaculatus* sister species *G. assimilis* (Additional file 1: Table S2). Accordingly, we assembled the RNA-seq datasets for *G. assimilis* shown in Additional file 1: Table S2 (490,414,291 trimmed reads in total). For this, the *G. assimilis* reads were *de novo* assembled into contigs using Trinity [105] set to default parameters using Galaxy (<https://usegalaxy.org/>). We then identified CDS using the Plant tribes pipeline tools [106]. To assess the completeness of the assembled transcriptome, we used BUSCO 3.0.1 [107] to reveal the percentage of the single-copy CDS that was observed in

the standardized Arthropod conserved gene set, and as employed in gVolante ([108] <https://gvolante.riken.jp/analysis.html>). To refine the CDS for *G. assimilis* we then assessed each CDS in ORF predictor, using its downloadable Perl script [67], to identify the highest quality reading frame per sequence. In ORF predictor, we used the option to include the best-hit (lowest e-value) BLASTX alignment (conducted in BLAST+ v2.7.1, <https://blast.ncbi.nlm.nih.gov>) [109] of *G. assimilis* versus the reference *G. bimaculatus* protein database (i.e., its translated 15,539 CDS) to define reading frames, and retained all *G. assimilis* CDS at least 150bp long and a start codon.

It is worth noting that while paired-end reads have often been used for RNA-seq assembly, transcriptome assemblies from single-end reads have been successfully employed to obtain CDS (not requiring isoforms) as studied herein [110, 111]. Further to this point, single-end reads have even been applied for *de novo* assemblies in non-traditional model systems [110, 111]. Here, we have the additional advantage of a closely related reference genome to *G. assimilis*, namely *G. bimaculatus* [59], to confirm/identify orthologs.

### **Ortholog identification and dN/dS**

Gene ortholog matches between *G. bimaculatus* and *G. assimilis* were identified using reciprocal BLASTX of the full CDS list between the two species in the program BLAST+ v2.7.1 (<https://blast.ncbi.nlm.nih.gov>) [109]. Genes having an identical best match sequence (lowest e-value) in both forward and reverse contrasts and  $e < 10^{-6}$  were defined as putative orthologs. The identified orthologous gene sequences in *G. bimaculatus* and *G. assimilis* were aligned by codons using MUSCLE [112] set to default parameters in the program Mega-CC v7 [113] and gaps removed. Removal of divergent regions from alignments, despite partial loss of sequence regions, improves quantification of protein divergence; thus, highly divergent segments were removed using the program GBlocks v. 0.91b set at default parameters [114, 115].

Using the aligned *G. bimaculatus* and *G. assimilis* CDS, we employed yn00 of PAML using the Yang and Nielson 2000 substitution model, which comprises a maximum likelihood method that accounts for codon usage biases [93, 116], to measure dN, dS, and dN/dS [93] (note that dN/dS measures using Yang and Neilson 2000 [116] were strongly correlated to those using other models; e.g., values from the Pamilo and Bianchi 1993 method [117] had Spearman's  $R=0.95$   $P < 2 \times 10^{-7}$ ). Values of dN/dS  $> 1$ ,  $= 1$ , and  $< 1$  suggest a prevalent history of positive

selection, neutral evolution and purifying selection respectively [93]. However, even when  $<1$  for gene-wide measures of dN/dS, elevated values suggest greater roles of positive selection and/or relaxed purifying constraint. Genes that were best matches by reciprocal BLASTX, and for which both values of dN and dS values were  $<1.5$  (and thus were unsaturated [118, 119]), were defined as high confidence orthologs (N=7,220) between *G. bimaculatus* and *G. assimilis* for dN/dS analysis. Thus, the paired alignments and dN, dS, and dN/dS measures herein are conservative.

## Positive selection tests

In our core assessments of gene-wide dN/dS using paired contrasts of *G. bimaculatus* and *G. assimilis* from the same genus, any values  $>1$  were interpreted as an indicator of a potential history of positive selection [93]. For conservative analysis, we included only those genes with both dN and dS  $>0$ .

In addition to this assessment, we examined positive selection at specific codon sites for the *G. bimaculatus* branch using branch-site analysis in codeml of PAML [93]. As an outgroup species was required for this assessment, we used the recently available assembled and annotated *Laupala kohalensis* genome [59]. Three-way orthologs between *G. bimaculatus*, *G. assimilis*, and *L. kohalensis* were identified using reciprocal BLASTX ( $e < 10^{-6}$ ) among each of the three paired species contrasts (our criterion was that for each *G. bimaculatus*-*G. assimilis* paired ortholog, the same matching *L. kohalensis* CDS must be found using reciprocal BLASTX to *G. bimaculatus* CDS and to *G. assimilis* CDS). Genes were aligned by codons using all three-species CDS and filtered using GBlocks [114, 115] and gaps removed as described in “Ortholog identification and dN/dS” (note: alignments using this relatively distant outgroup were conducted independently of the paired *Gryllus* alignments). The phylogeny was (*G. bimaculatus*, *G. assimilis*), *L. kohalensis*) and was unrooted for the PAML free-ratio analysis (Model=1, NSsites=0 in codeml) that was used to determine dN and dS per branch. Only those genes with dN and dS below three [23] in the *L. kohalensis* branch were defined as high confidence orthologs and used for branch-site analysis (unlike the two-species contrasts within *Gryllus* which were more closely related and had a cut-off of 1.5). For genes meeting these criteria, positive selection was assessed on the *G. bimaculatus* branch using Chi-square values for  $2X\Delta\ln$  Likelihood between models with and without positive selection was determined as described in

the PAML manual [93]. We note that our stringent approach to defining three-way orthologs favors study of the more conservative portion of the genome for branch-site analysis. Further, some studies have suggested that branch-site analysis can lack sensitivity to detect functional changes [120, 121], and/or may generate false positives [121, 122], the latter likely being sensitive to the stringency of alignment. We thus aimed to control this factor by our conservative approach to this assessment (excluding genes with any signs of dN or dS saturation).

## **Pleiotropy analysis**

Expression breadth across tissues can serve as a proxy to study pleiotropy, or multifunctionality of a gene, which is thought to strengthen purifying selection, and in turn restrict adaptive evolutionary potential [8, 17-20, 57, 58, 69]. In other words, in theory genes with low pleiotropy are hypothesized to experience relatively relaxed purifying selection, and thus may be freer to evolve adaptive (mutational) changes. To assess the relationship between pleiotropy and molecular evolution in *G. bimaculatus*, we determined the breadth of expression of each studied gene across all nine tissues that had available RNA-seq reads (at a level of  $\geq 5$  FPKM per tissue, Additional file 1: Table S1) including the male and female gonad, somatic reproductive system, brain and ventral nerve cord and the male accessory glands. Expression breadth was evaluated with respect to dN/dS, and particularly adaptive evolution ( $dN/dS > 1$ ), of the sex-biased genes.

## **Sex-biased expression between *G. bimaculatus* and *G. assimilis***

As a supplementary analysis to our core assessment of sex-biased expression in our main target taxon *G. bimaculatus*, we also examined sex-biased transcription of genes in *G. assimilis*. For this, we focused on the gonads, which had the highest number of sex-biased genes among tissues in *G. bimaculatus* (see Results). We assessed the correlation in expression for orthologs between the two species using Spearman's ranked correlations. In turn, we determined those genes with conserved and variable sex-biased expression status in the gonads between species, and their relationships to dN/dS.

## **Gene ontology**

Gene ontology (GO) was characterized using the tool DAVID [71]. For this, we identified orthologs to *G. bimaculatus* in the insect model *D. melanogaster*, which has the most well-studied insect genome to date (CDS v6.24 available from [www.flybase.org](http://www.flybase.org) [70]), using BLASTX (<https://blast.ncbi.nlm.nih.gov>) [109] and the best match (lowest e-value with cut off of  $e < 10^{-3}$  of *D. melanogaster*). Single direction BLASTX with *G. bimaculatus* CDS as the query to the *D. melanogaster* protein database was used for these assessments (unlike for the more rigorous reciprocal BLASTX analysis used to identify orthologs between the two *Gryllus* species for dN/dS analysis), as reciprocal BLASTX would be overly conservative between these insects from different orders for the purpose of functional characterization and analysis. *D. melanogaster* gene identifiers were input into DAVID [71] to obtain gene putative GO functions and/or classifications.

It is important to note that for functional analysis, more than one *G. bimaculatus* gene could match a single *D. melanogaster* gene (as non-reciprocal BLASTX was used). In such cases, this would suggest two or more paralogs of the same *D. melanogaster* gene existed in the cricket species.

## Seminal fluid proteins

As a supplemental reproductive assessment in *G. bimaculatus*, we examined seminal fluid proteins (SFPs). The SFPs are included in the fluids transferred with the sperm to the female reproductive tract, and are thought to play crucial roles in sperm vitality, sperm storage in female organs and in fertilization [52]. A recent proteome analysis of sexual structures in *D. melanogaster* confirmed functions for 125 previously identified SFPs in that insect, and revealed nine newly identified SFPs [52], that may be used as a reference to study SFPs in crickets. Thus, using this very recent list of 134 SFPs in *D. melanogaster* we identified putative orthologs of SFPs in *G. bimaculatus* and between *G. bimaculatus* and *G. assimilis* and assessed the dN/dS values of these genes. All between-order comparisons between *Gryllus bimaculatus* to *D. melanogaster* genes herein, including for these SFPs, are single direction BLASTX.

## List of abbreviations

TSSB, tissue-specific sex bias

FPKM, frequency per kilobase million

# **Declarations**

## ***Ethics approval and consent to participate***

Not applicable.

## ***Consent for publication***

Not applicable.

## ***Availability of data and material***

All RNA-seq data under study are described in Additional file 1: Table S1 and Table S2 and are available at the Short Read Archive (SRA) under the project identifier PRJNA564136.

## ***Competing interests***

The authors declare they have no competing interests.

## ***Funding***

This work was supported by funds from Harvard University.

## ***Acknowledgements***

The authors thank Dr. Guillem Ylla for providing early access to the assembled *G. bimaculatus* and *L. kohalensis* genomes and members of the Extavour lab for discussions. The services of the Bauer core sequencing facility at Harvard University are appreciated.

## ***Authors' contributions***

CAW, AK and CGE designed the study. CAW analyzed data and wrote the manuscript with contributions by AK and CGE. AK reared *G. bimaculatus* and *G. assimilis* and sampled tissues for RNA-seq. All authors read and approved the final manuscript.

## 787 **Additional Files**

788 Additional File 1: The file contains the supplementary Tables, Figures and Text which are  
789 denoted and Tables S1 to S7, Figures S1 to S2, and Text File S1.

## References

1. Ellegren H, Parsch J: **The evolution of sex-biased genes and sex-biased gene expression.** *Nat Rev Genet* 2007, **8**(9):689-698.
2. Grath S, Parsch J: **Sex-Biased Gene Expression.** *Annu Rev Genet* 2016, **50**:29-44.
3. Ingleby FC, Flis I, Morrow EH: **Sex-biased gene expression and sexual conflict throughout development.** *Cold Spring Harb Perspect Biol* 2014, **7**(1):a017632.
4. Haerty W, Jagadeeshan S, Kulathinal RJ, Wong A, Ram KR, Sirot LK, Levesque L, Artieri CG, Wolfner MF, Civetta A *et al*: **Evolution in the fast lane: rapidly evolving sex-related genes in *Drosophila*.** *Genetics* 2007, **177**:1321-1335.
5. Jagadeeshan S, Singh RS: **Rapidly evolving genes of *Drosophila*: differing levels of selective pressure in testis, ovary, and head tissues between sibling species.** *Mol Biol Evol* 2005, **22**(9):1793-1801.
6. Jiang ZF, Machado CA: **Evolution of sex-dependent gene expression in three recently diverged species of *Drosophila*.** *Genetics* 2009, **183**(3):1175-1185.
7. Zhang Y, Sturgill D, Parisi M, Kumar S, Oliver B: **Constraint and turnover in sex-biased gene expression in the genus *Drosophila*.** *Nature* 2007, **450**(7167):233-237.
8. Meisel RP: **Towards a more nuanced understanding of the relationship between sex-biased gene expression and rates of protein-coding sequence evolution.** *Mol Biol Evol* 2011, **28**(6):1893-1900.
9. Grath S, Parsch J: **Rate of amino acid substitution is influenced by the degree and conservation of male-biased transcription over 50 myr of *Drosophila* evolution.** *Genome Biol Evol* 2012, **4**:346-359.
10. Whittle CA, Extavour CG: **Selection shapes turnover and magnitude of sex-biased expression in *Drosophila* gonads.** *BMC Evol Biol* 2019, **19**(1):60 (doi: 10.1186/s12862-12019-11377-12864).
11. Perry JC, Harrison PW, Mank JE: **The Ontogeny and Evolution of Sex-Biased Gene Expression in *Drosophila melanogaster*.** *Mol Biol Evol* 2015, **31**:1206-1219.
12. Dorus S, Busby SA, Gerike U, Shabanowitz J, Hunt DF, Karr TL: **Genomic and functional evolution of the *Drosophila melanogaster* sperm proteome.** *Nature Genetics* 2006, **38**(12):1440-1445.
13. Whittle CA, Kulkarni A, Extavour CG: **Absence of a faster-X effect in beetles (*Tribolium*, *Coleoptera*).** *G3 (Bethesda)* 2020, **10**:1125–1136.
14. Zhang Z, Hambuch TM, Parsch J: **Molecular evolution of sex-biased genes in *Drosophila*.** *Mol Biol Evol* 2004, **21**(11):2130-2139.
15. Proschel M, Zhang Z, Parsch J: **Widespread adaptive evolution of *Drosophila* genes with sex-biased expression.** *Genetics* 2006, **174**(2):893-900.
16. Swanson WJ, Clark AG, Waldrip-Dail HM, Wolfner MF, Aquadro CF: **Evolutionary EST analysis identifies rapidly evolving male reproductive proteins in *Drosophila*.** *Proc Natl Acad Sci USA* 2001, **98**:7375-7379.
17. Mank JE, Ellegren H: **Are sex-biased genes more dispensable?** *Biol Lett* 2009, **5**(3):409-412.
18. Dean R, Mank JE: **Tissue Specificity and Sex-Specific Regulatory Variation Permit the Evolution of Sex-Biased Gene Expression.** *Am Nat* 2016, **188**:E74-E84.
19. Assis R, Zhou Q, Bachtrog D: **Sex-biased transcriptome evolution in *Drosophila*.** *Genome Biol Evol* 2012, **4**(11):1189-1200.
20. Whittle CA, Extavour CG: **Rapid Evolution of Ovarian-Biased Genes in the Yellow Fever Mosquito (*Aedes aegypti*).** *Genetics* 2017, **206**(4):2119-2137.
21. Papa F, Windbichler N, Waterhouse RM, Cagnetti A, D'Amato R, Persampieri T, Lawniczak MK, Nolan T, Papathanos PA: **Rapid evolution of female-biased genes among four species of *Anopheles malaria* mosquitoes.** *Genome Res* 2017, **27**(9):1536-1548.
22. Wright AE, Mank JE: **The scope and strength of sex-specific selection in genome evolution.** *J Evol Biol* 2013, **26**(9):1841-1853.

23. Mank JE, Hultin-Rosenberg L, Axelsson E, Ellegren H: **Rapid evolution of female-biased, but not male-biased, genes expressed in the avian brain.** *Mol Biol Evol* 2007, **24**(12):2698-2706.
24. Dalton JE, Kacheria TS, Knott SR, Lebo MS, Nishitani A, Sanders LE, Stirling EJ, Winbush A, Arbeitman MN: **Dynamic, mating-induced gene expression changes in female head and brain tissues of *Drosophila melanogaster*.** *BMC Genomics* 2010, **11**:541.
25. Naurin S, Hansson B, Hasselquist D, Kim YH, Bensch S: **The sex-biased brain: sexual dimorphism in gene expression in two species of songbirds.** *BMC Genomics* 2011, **12**:37.
26. Small CM, Carney GE, Mo Q, Vannucci M, Jones AG: **A microarray analysis of sex- and gonad-biased gene expression in the zebrafish: evidence for masculinization of the transcriptome.** *BMC Genomics* 2009, **10**:579.
27. Santos EM, Kille P, Workman VL, Paull GC, Tyler CR: **Sexually dimorphic gene expression in the brains of mature zebrafish.** *Comp Biochem Physiol A Mol Integr Physiol* 2008, **149**(3):314-324.
28. Catalan A, Hutter S, Parsch J: **Population and sex differences in *Drosophila melanogaster* brain gene expression.** *BMC Genomics* 2012, **13**:654.
29. Shi L, Zhang Z, Su B: **Sex Biased Gene Expression Profiling of Human Brains at Major Developmental Stages.** *Scientific Reports* 2016, **6**:21181.
30. Tomchaney M, Mysore K, Sun L, Li P, Emrich SJ, Severson DW, Duman-Scheel M: **Examination of the genetic basis for sexual dimorphism in the *Aedes aegypti* (dengue vector mosquito) pupal brain.** *Biol Sex Differ* 2014, **5**:10.
31. Yang L, Zhang Z, He S: **Both Male-Biased and Female-Biased Genes Evolve Faster in Fish Genomes.** *Genome Biol Evol* 2016, **8**(11):3433-3445.
32. Khodursky S, Svetec N, Durkin SM, Zhao L: **The evolution of sex-biased gene expression in the *Drosophila* brain.** *Genome Res* 2020.
33. Drapeau MD, Radovic A, Wittkopp PJ, Long AD: **A gene necessary for normal male courtship, yellow, acts downstream of fruitless in the *Drosophila melanogaster* larval brain.** *J Neurobiol* 2003, **55**(1):53-72.
34. Kadener S, Villella A, Kula E, Palm K, Pyza E, Botas J, Hall JC, Rosbash M: **Neurotoxic protein expression reveals connections between the circadian clock and mating behavior in *Drosophila*.** *Proc Natl Acad Sci U S A* 2006, **103**(36):13537-13542.
35. Dauwalder B: **Systems behavior: of male courtship, the nervous system and beyond in *Drosophila*.** *Curr Genomics* 2008, **9**(8):517-524.
36. Catalan A, Macias-Munoz A, Briscoe AD: **Evolution of Sex-Biased Gene Expression and Dosage Compensation in the Eye and Brain of *Heliconius* Butterflies.** *Mol Biol Evol* 2018, **35**(9):2120-2134.
37. Congrains C, Campanini EB, Torres FR, Rezende VB, Nakamura AM, Oliveira JLD, Lima ALA, Chahad-Ehlers S, Sobrinho IS, Brito RAD: **Evidence of Adaptive Evolution and Relaxed Constraints in Sex-Biased Genes of South American and West Indies Fruit Flies (Diptera: Tephritidae).** *Genome Biol Evol* 2018, **10**(1):380-395.
38. Misof B, Liu S, Meusemann K, Peters RS, Donath A, Mayer C, Frandsen PB, Ware J, Flouri T, Beutel RG *et al*: **Phylogenomics resolves the timing and pattern of insect evolution.** *Science* 2014, **346**(6210):763-767.
39. Kulkarni A, Extavour CG: **The Cricket *Gryllus bimaculatus*: Techniques for Quantitative and Functional Genetic Analyses of Cricket Biology.** *Results and Problems in Cell Differentiation* 2019, **Volume 68**:183-216.
40. Mito T, Noji S: **The Two-Spotted Cricket *Gryllus bimaculatus*: An Emerging Model for Developmental and Regeneration Studies.** *CSH Protoc* 2008, **2008**:pdb emo110.
41. Donoughe S, Extavour CG: **Embryonic development of the cricket *Gryllus bimaculatus*.** *Dev Biol* 2016, **411**(1):140-156.
42. Vedenina VY, Shestakov LS: **Loser in Fight but Winner in Love: How Does Inter-Male Competition Determine the Pattern and Outcome of Courtship in Cricket *Gryllus bimaculatus*?** *Frontiers in Ecology and Evolution* 2018, **27**:<https://doi.org/10.3389/fevo.2018.00197>.

43. Gee D: **The effects of weaponry and mating experience on the level and outcome of agonistic interactions in male field crickets, *Gryllus bimaculatus* (orthoptera: Gryllidae).** *PhD Thesis* 2019, University of Derby, UK.
44. Lyons C, Barnard D: **A learned response to sperm competition in the field cricket, *Gryllus bimaculatus* (de Geer).** *Animal Behavior* 2006, **72**:673-680.
45. Morrow EH, Gage MG, H: **Sperm competition experiments between lines of crickets producing different sperm lengths.** *Proceedings of the Royal Society of London Series B: Biological Sciences* 2001, **268**:2281-2286.
46. Simmons LW: **Female choice in the field cricket *Gryllus bimaculatus* (De Geer).** *Animal Behavior* 1986, **34**:1463-1470.
47. Zhemchuzhnikov MK, Kutcherov DA, Kymre JHea: **Louder Songs can Enhance Attractiveness of Old Male Crickets (*Gryllus Bimaculatus*).** *Journal of Insect Behavior* 2017, **30**:211-219.
48. Bateman PW, Giliston LN, Ferguson JWH: **Male size and sequential mate preference in the cricket *Gryllus bimaculatus*.** *Animal Behavior* 2001, **61**:631-637.
49. Matsumoto Y, Sakai M: **Brain control of mating behavior in the male cricket *Gryllus bimaculatus* DeGeer: brain neurons responsible for inhibition of copulation actions.** *J Insect Physiol* 2000, **46**(4):539-552.
50. Sakai M, Kumashiro M, Matsumoto Y, Ureshi M, Otsubo T: **Reproductive Behavior and Physiology in the Cricket *Gryllus bimaculatus*.** *The Cricket as a Model Organism* 2017, (Horch et al. (eds.) Springer ):245-269.
51. Haberkern H, Hedwig B: **Behavioural integration of auditory and antennal stimulation during phonotaxis in the field cricket *Gryllus bimaculatus*.** *J Exp Biol* 2016, **219**(Pt 22):3575-3586.
52. Sepil I, Hopkins BR, Dean R, Thezenas ML, Charles PD, Konietzny R, Fischer R, Kessler BM, Wigby S: **Quantitative Proteomics Identification of Seminal Fluid Proteins in Male *Drosophila melanogaster*.** *Mol Cell Proteomics* 2019, **18**(Suppl 1):S46-S58.
53. Clark NL, Swanson WJ: **Pervasive adaptive evolution in primate seminal proteins.** *PLoS Genet* 2005, **1**(3):e35.
54. Swanson WJ, Vacquier VD: **The rapid evolution of reproductive proteins.** *Nat Rev Genet* 2002, **3**(2):137-144.
55. Swanson WJ, Wong A, Wolfner MF, Aquadro CF: **Evolutionary expressed sequence tag analysis of *Drosophila* female reproductive tracts identifies genes subjected to positive selection.** *Genetics* 2004, **168**(3):1457-1465.
56. Panhuis TM, Swanson WJ: **Molecular evolution and population genetic analysis of candidate female reproductive genes in *Drosophila*.** *Genetics* 2006, **173**(4):2039-2047.
57. Mank JE, Hultin-Rosenberg L, Zwahlen M, Ellegren H: **Pleiotropic constraint hampers the resolution of sexual antagonism in vertebrate gene expression.** *Am Nat* 2008, **171**:35-43.
58. Otto SP: **Two steps forward, one step back: the pleiotropic effects of favoured alleles.** *Proc Biol Sci* 2004, **271**(1540):705-714.
59. Ylla G, Nakamura T, Itoh T, Kajitani R, Toyoda A, Tomonari S, Bando T, Ishimaru Y, Watanabe T, Fuketa M *et al*: **Cricket genomes: the genomes of future food.** *bioRxiv* 2020:2020/191841.
60. Harrison PW, Wright AE, Zimmer F, Dean R, Montgomery SH, Pointer MA, Mank JE: **Sexual selection drives evolution and rapid turnover of male gene expression.** *Proc Natl Acad Sci USA* 2015, **112**(14):4393-4398.
61. Whittle CA, Extavour CG: **Contrasting patterns of molecular evolution in metazoan germ line genes.** *BMC Evol Biol* 2019, **19**(1):53 (doi: 10.1186/s12862-12019-11363-x).
62. Parisi M, Nuttall R, Edwards P, Minor J, Naiman D, Lü J, Doctolero M, Vainer M, Chan C, Malley J *et al*: **A survey of ovary-, testis-, and soma-biased gene expression in *Drosophila melanogaster* adults.** *Genome Biol* 2004, **5**:R40.
63. Arbeitman MN, Fleming AA, Siegal ML, Null BH, Baker BS: **A genomic analysis of *Drosophila* somatic sexual differentiation and its regulation.** *Development* 2004, **131**(9):2007-2021.

64. Oliver TA, Garfield DA, Manier MK, Haygood R, Wray GA, Palumbi SR: **Whole-genome positive selection and habitat-driven evolution in a shallow and a deep-sea urchin.** *Genome Biol Evol* 2010, **2**:800-814.
65. Jaquiere J, Peccoud J, Ouisse T, Legeai F, Prunier-Leterme N, Gouin A, Nouhaud P, Brisson JA, Bickel R, Purandare S *et al*: **Disentangling the Causes for Faster-X Evolution in Aphids.** *Genome Biol Evol* 2018, **10**(2):507-520.
66. Baines JF, Sawyer SA, Hartl DL, Parsch J: **Effects of X-linkage and sex-biased gene expression on the rate of adaptive protein evolution in *Drosophila*.** *Mol Biol Evol* 2008, **25**(8):1639-1650.
67. Min XJ, Butler G, Storms R, Tsang A: **OrfPredictor: predicting protein-coding regions in EST-derived sequences.** *Nucleic Acids Res* 2005, **33**(Web Server issue):W677-680.
68. Altschul SF, Gish W, Miller W, Myers EW, Lipman DJ: **Basic local alignment search tool.** *J Mol Biol* 1990, **215**(3):403-410.
69. Larracunte AM, Sackton TB, Greenberg AJ, Wong A, Singh ND, Sturgill D, Zhang Y, Oliver B, Clark AG: **Evolution of protein-coding genes in *Drosophila*.** *Trends Genet* 2008, **24**(3):114-123.
70. Gramates LS, Marygold SJ, Santos GD, Urbano JM, Antonazzo G, Matthews BB, Rey AJ, Tabone CJ, Crosby MA, Emmert DB *et al*: **FlyBase at 25: looking to the future.** *Nucleic Acids Res* 2017, **45**:D663-D671.
71. Huang da W, Sherman BT, Lempicki RA: **Systematic and integrative analysis of large gene lists using DAVID bioinformatics resources.** *Nature Protocols* 2009, **4**(1):44-57.
72. Musacchio M, Perrimon N: **The *Drosophila* kekkon genes: novel members of both the leucine-rich repeat and immunoglobulin superfamilies expressed in the CNS.** *Dev Biol* 1996, **178**(1):63-76.
73. MacLaren CM, Evans TA, Alvarado D, Duffy JB: **Comparative analysis of the Kekkon molecules, related members of the LIG superfamily.** *Dev Genes Evol* 2004, **214**(7):360-366.
74. Boekhoff-Falk G, Eberl DF: **The *Drosophila* Auditory System.** *Wiley Interdiscip Rev Dev Biol* 2014(3):179-191.
75. Todi SV, Franke JD, Kiehart DP, Eberl DF: **Myosin VIIA defects, which underlie the Usher 1B syndrome in humans, lead to deafness in *Drosophila*.** *Curr Biol* 2005, **15**(9):862-868.
76. Schneider ES, Romer H, Robillard T, Schmidt AKD: **Hearing with exceptionally thin tympana: Ear morphology and tympanal membrane vibrations in eucephaline crickets.** *Sci Rep* 2017, **7**(1):15266.
77. Lankheet MJ, Cerkvenik U, Larsen ON, van Leeuwen JL: **Frequency tuning and directional sensitivity of tympanal vibrations in the field cricket *Gryllus bimaculatus*.** *J R Soc Interface* 2017, **14**(128).
78. Yoritsune A, Aonuma H: **The anatomical pathways for antennal sensory information in the central nervous system of the cricket, *Gryllus bimaculatus*.** *Invert Neurosci* 2012, **12**(2):103-117.
79. Murakami S, Itoh MT: **Removal of both antennae influences the courtship and aggressive behaviors in male crickets.** *J Neurobiol* 2003, **57**(1):110-118.
80. Pennell TM, de Haas FJ, Morrow EH, van Doorn GS: **Contrasting effects of intralocus sexual conflict on sexually antagonistic coevolution.** *Proc Natl Acad Sci U S A* 2016, **113**(8):E978-986.
81. Mank JE, Wedell N, Hosken DJ: **Polyandry and sex-specific gene expression.** *Philos Trans R Soc Lond B Biol Sci* 2013, **368**(1613):20120047.
82. Koene JM, Liew TS, Montagne-Wajer K, Schilthuisen M: **A syringe-like love dart injects male accessory gland products in a tropical hermaphrodite.** *PLoS One* 2013, **8**(7):e69968.
83. Parsch J, Ellegren H: **The evolutionary causes and consequences of sex-biased gene expression.** *Nat Rev Genet* 2013, **14**(2):83-87.
84. Pai A, Bernasconi G: **Polyandry and female control: the red flour beetle *Tribolium castaneum* as a case study.** *J Exp Zool B Mol Dev Evol* 2008, **310**(2):148-159.
85. Helinski ME, Valerio L, Facchinelli L, Scott TW, Ramsey J, Harrington LC: **Evidence of polyandry for *Aedes aegypti* in semifield enclosures.** *Am J Trop Med Hyg* 2012, **86**(4):635-641.
86. Oliva CF, Damiens D, Benedict MQ: **Male reproductive biology of *Aedes* mosquitoes.** *Acta Trop* 2014, **132** Suppl:S12-19.

87. Avila FW, Wong A, Sitnik JL, Wolfner MF: **Don't pull the plug! the *Drosophila* mating plug preserves fertility.** *Fly (Austin)* 2015, **9**(2):62-67.
88. Manier MK, Belote JM, Berben KS, Novikov D, Stuart WT, Pitnick S: **Resolving mechanisms of competitive fertilization success in *Drosophila melanogaster*.** *Science* 2010, **328**(5976):354-357.
89. Trotschel C, Hamzeh H, Alvarez L, Pascal R, Lavryk F, Bonigk W, Korschen HG, Muller A, Poetsch A, Rennhack A *et al*: **Absolute proteomic quantification reveals design principles of sperm flagellar chemosensation.** *EMBO J* 2019:e102723.
90. Tautz D, Domazet-Loso T: **The evolutionary origin of orphan genes.** *Nat Rev Genet* 2011, **12**(10):692-702.
91. Fedorka KM, Winterhalter WE, Ware B: **Perceived sperm competition intensity influences seminal fluid protein production prior to courtship and mating.** *Evolution* 2011, **65**(2):584-590.
92. Heifetz Y, Lung O, Frongillo EA, Jr., Wolfner MF: **The *Drosophila* seminal fluid protein Acp26Aa stimulates release of oocytes by the ovary.** *Curr Biol* 2000, **10**(2):99-102.
93. Yang Z: **PAML 4: phylogenetic analysis by maximum likelihood.** *Mol Biol Evol* 2007, **24**(8):1586-1591.
94. Blankers T, Oh KP, Bombarely A, Shaw KL: **The Genomic Architecture of a Rapid Island Radiation: Recombination Rate Variation, Chromosome Structure, and Genome Assembly of the Hawaiian Cricket *Laupala*.** *Genetics* 2018, **209**(4):1329-1344.
95. Prokupek A, Hoffmann F, Eyun SI, Moriyama E, Zhou M, Harshman L: **An evolutionary expressed sequence tag analysis of *Drosophila* spermatheca genes.** *Evolution* 2008, **62**(11):2936-2947.
96. McDonald JH, Kreitman M: **Adaptive protein evolution at the *Adh* locus in *Drosophila*.** *Nature* 1991, **351**(6328):652-654.
97. Tuller T, Kupiec M, Ruppén E: **Evolutionary rate and gene expression across different brain regions.** *Genome Biol* 2008, **9**(9):R142.
98. Kumashiro M, Sakai M: **Reproductive behavior in the male cricket *Gryllus bimaculatus* DeGeer: I. Structure and function of the genitalia.** *Journal of Experimental Biology* 2001(204):1123-1137.
99. Kainz F, Ewen-Campen B, Akam M, Extavour CG: **Delta/Notch signalling is not required for segment generation in the basally branching insect *Gryllus bimaculatus*.** *Development* 2011, **138**(22):5015-5026.
100. Kainz F, Ewen-Campen B, Akam M, Extavour CG: **Notch/Delta signalling is not required for segment generation in the basally branching insect *Gryllus bimaculatus*.** *Development* 2011, **138**(22):5015-5026.
101. Kochi Y, Miyashita A, Tsuchiya K, Mitsuyama M, Sekimizu K, Kaito C: **A human pathogenic bacterial infection model using the two-spotted cricket, *Gryllus bimaculatus*.** *FEMS Microbiol Lett* 2016, **363**(15).
102. Kearse M, Moir R, Wilson A, Stones-Havas S, Cheung M, Sturrock S, Buxton S, Cooper A, Markowitz S, Duran C *et al*: **Geneious Basic: an integrated and extendable desktop software platform for the organization and analysis of sequence data.** *Bioinformatics* 2012, **28**(12):1647-1649.
103. Langdon WB: **Performance of genetic programming optimised Bowtie2 on genome comparison and analytic testing (GCAT) benchmarks.** *BioData Min* 2015, **8**(1):1.
104. Love MI, Huber W, Anders S: **Moderated estimation of fold change and dispersion for RNA-seq data with DESeq2.** *Genome Biol* 2014, **15**(12):550.
105. Grabherr MG, Haas BJ, Yassour M, Levin JZ, Thompson DA, Amit I, Adiconis X, Fan L, Raychowdhury R, Zeng Q *et al*: **Full-length transcriptome assembly from RNA-Seq data without a reference genome.** *Nat Biotechnol* 2011, **29**(7):644-652.
106. Wall PK, Leebens-Mack J, Muller KF, Field D, Altman NS, dePamphilis CW: **PlantTribes: a gene and gene family resource for comparative genomics in plants.** *Nucleic Acids Res* 2008, **36**(Database issue):D970-976.
107. Seppey M, Manni M, Zdobnov EM: **BUSCO: Assessing Genome Assembly and Annotation Completeness.** *Methods Mol Biol* 2019, **1962**:227-245.

108. Nishimura O, Hara Y, Kuraku S: **gVolante for standardizing completeness assessment of genome and transcriptome assemblies.** *Bioinformatics* 2017, **33**(22):3635-3637.
109. Altschul SF, Madden TL, Schaffer AA, Zhang J, Zhang Z, Miller W, Lipman DJ: **Gapped BLAST and PSI-BLAST: a new generation of protein database search programs.** *Nucleic Acids Res* 1997, **25**(17):3389-3402.
110. Hibsh D, Schori H, Efroni S, Shefi O: **De novo transcriptome assembly databases for the central nervous system of the medicinal leech.** *Sci Data* 2015, **2**:150015.
111. Gongora-Castillo E, Buell CR: **Bioinformatics challenges in de novo transcriptome assembly using short read sequences in the absence of a reference genome sequence.** *Nat Prod Rep* 2013, **30**(4):490-500.
112. Edgar RC: **MUSCLE: a multiple sequence alignment method with reduced time and space complexity.** *BMC Bioinformatics* 2004, **5**:113.
113. Kumar S, Stecher G, Peterson D, Tamura K: **MEGA-CC: computing core of molecular evolutionary genetics analysis program for automated and iterative data analysis.** *Bioinformatics* 2012, **28**(20):2685-2686.
114. Talavera G, Castresana J: **Improvement of phylogenies after removing divergent and ambiguously aligned blocks from protein sequence alignments.** *Syst Biol* 2007, **56**(4):564-577.
115. Castresana J: **Selection of conserved blocks from multiple alignments for their use in phylogenetic analysis.** *Mol Biol Evol* 2000, **17**(4):540-552.
116. Yang Z, Nielsen R: **Estimating synonymous and nonsynonymous substitution rates under realistic evolutionary models.** *Mol Biol Evol* 2000, **17**(1):32-43.
117. Pamilo P, Bianchi NO: **Evolution of the Zfx and Zfy genes: rates and interdependence between the genes.** *Mol Biol Evol* 1993, **10**(2):271-281.
118. Castillo-Davis CI, Bedford TB, Hartl DL: **Accelerated rates of intron gain/loss and protein evolution in duplicate genes in human and mouse malaria parasites.** *Mol Biol Evol* 2004, **21**(7):1422-1427.
119. Treangen TJ, Rocha EP: **Horizontal transfer, not duplication, drives the expansion of protein families in prokaryotes.** *PLoS Genet* 2011, **7**(1):e1001284.
120. Toll-Riera M, Laurie S, Alba MM: **Lineage-specific variation in intensity of natural selection in mammals.** *Mol Biol Evol* 2011, **28**(1):383-398.
121. Nozawa M, Suzuki Y, Nei M: **Reliabilities of identifying positive selection by the branch-site and the site-prediction methods.** *Proc Natl Acad Sci U S A* 2009, **106**(16):6700-6705.
122. Wisotsky SR, Kosakovsky Pond SL, Shank SD, Muse SV: **Synonymous site-to-site substitution rate variation dramatically inflates false positive rates of selection analyses: ignore at your own peril.** *Mol Biol Evol* 2020, <https://doi.org/10.1093/molbev/msaa037>.
123. Huber F: **The role of the central nervous system in orthoptera during the co-ordination and control of stridulation.** 1963, *Acoustic Behaviour of Animals*, Elsevier Publishing Company, Amsterdam London New York; R.G. Busnel (Ed.):440-488.
124. Jacob PF, Hedwig B: **Acoustic signalling for mate attraction in crickets: Abdominal ganglia control the timing of the calling song pattern.** *Behav Brain Res* 2016, **309**:51-66.

**Table 1.** The dN/dS values and GO functions of all female-biased brain genes and male-biased brain genes among the 7,220 genes with *G. bimaculatus*-*G. assimilis* orthologs (Fig 2B). GO terms are from DAVID software [71] using those *G. bimaculatus* genes with putative *D. melanogaster* (Dmel) orthologs. TSSB indicates genes that have tissue-specific sex-biased expression in the brain and are unbiased in all other tissues (shown by “\*”; Fig. 3A). Gonad sex bias (GSB) indicates the gene has the same female- or male-biased expression in the gonad as in brain and is unbiased in other tissues (“\*\*”). Genes are listed by highest to lowest dN/dS values.

| <i>G. bimaculatus</i> ID             | dN/dS  | TSSB | GSB | Matching Dmel ID | Dmel gene name <sup>a</sup>                  | GO terms                                                  |
|--------------------------------------|--------|------|-----|------------------|----------------------------------------------|-----------------------------------------------------------|
| <b>Female-biased in brain (N=20)</b> |        |      |     |                  |                                              |                                                           |
| GBI_10990-RA                         | 0.9739 | *    |     | FBgn0028370      | <i>Kekkon-3 (kek3)</i>                       | Plasma membrane                                           |
| GBI_06557-RA                         | 0.8282 |      |     | FBgn0035082      | CG2811                                       | AIG2-like, Butirosin biosynthesis, Acyltransferase        |
| GBI_06507-RA                         | 0.564  |      |     | FBgn0035951      | CG5068                                       | Plasma membrane, Alpha/beta hydrolase fold-1              |
| GBI_00147-RA                         | 0.527  |      |     | No match         |                                              |                                                           |
| GBI_11079-RA                         | 0.5226 |      |     | FBgn0031265      | CG2794                                       | Metabolic process                                         |
| GBI_14015-RA                         | 0.4598 |      |     | FBgn0038395      | <u>CG10407</u>                               | Multicellular reproduction                                |
| GBI_14708-RA                         | 0.3835 | *    |     | FBgn0003870      | <i>tramtrack (ttk)</i>                       | Inter-male aggressive behavior, nervous system            |
| GBI_01688-RA                         | 0.3273 | *    |     | FBgn0011604      | <i>Imitation SWI (Iswi)</i>                  | Chromatin organization                                    |
| GBI_16251-RA                         | 0.2633 | *    |     | FBgn0052432      | CG32432                                      | Integral component of membrane                            |
| GBI_04158-RA                         | 0.2452 |      |     | FBgn0027582      | CG6230                                       | Plasma membrane                                           |
| GBI_17348-RA                         | 0.2439 |      |     | FBgn0011695      | <i>Ejaculatory bulb protein III (EbpIII)</i> | Insect pheromone-binding protein, post-mating behavior    |
| GBI_05906-RA                         | 0.2258 |      |     | FBgn0033215      | CG1942                                       | Mesoderm development                                      |
| GBI_13745-RB                         | 0.1525 | *    |     | FBgn0010380      | <i>Adaptor protein (AP-1-2beta)</i>          | Neurotransmitter secretion, synaptic vesicle coating      |
| GBI_09497-RB                         | 0.1433 |      | **  | No match         |                                              |                                                           |
| GBI_00160-RA                         | 0.0692 |      |     | FBgn0026876      | CG11403                                      | DNA binding                                               |
| GBI_07457-RC                         | 0.0558 |      |     | FBgn0037659      | <i>Lysine (K)- demethylase 2 (Kdm2)</i>      | Transcription, DNA-templated                              |
| GBI_04405-RA                         | 0.0451 |      | **  | FBgn0024997      | CG2681                                       | Apoptotic process, multicellular development              |
| GBI_06070-RA                         | 0.0357 |      |     | FBgn0035724      | CG10064                                      | WD40 repeat, dehydrogenase-like superfamily               |
| GBI_02686-RA                         | 0      |      | **  | FBgn0000317      | <i>crinkled (ck)</i>                         | Sensory organ development                                 |
| GBI_09453-RB                         | 0      | *    |     | FBgn0031550      | <i>Intraflagellar transport 57 (IFT57)</i>   | Apoptotic process                                         |
| <b>Male-biased in brain (N=45)</b>   |        |      |     |                  |                                              |                                                           |
| GBI_19557-RB                         | 3.675  | *    |     | FBgn0030947      | CG6696                                       | Proteolysis, metalloendopeptidase activity                |
| GBI_01683-RA                         | 0.7988 | *    |     | FBgn0039590      | CG10011                                      | Intracellular protein transport                           |
| GBI_10265-RB                         | 0.6262 |      |     | FBgn0035132      | <i>methuselah-like 10 (mthl10)</i>           | G-protein coupled receptor activity, alternative splicing |
| GBI_09477-RB                         | 0.6208 |      |     | FBgn0004364      | <i>18-wheeler (18w)</i>                      | Transmembrane signaling receptor activity                 |
| GBI_01684-RA                         | 0.5977 | *    |     | FBgn0031473      | CG3104                                       | Ankyrin repeat, ER to Golgi vesicle transport             |
| GBI_17358-RA                         | 0.4488 |      | **  | FBgn0011695      | <i>Ejaculatory bulb protein III (EbpIII)</i> | Insect pheromone-binding protein, post-mating behavior    |

|              |        |    |             |                                             |                                                            |
|--------------|--------|----|-------------|---------------------------------------------|------------------------------------------------------------|
| GBI_03471-RA | 0.4445 |    | FBgn0019972 | <i>Death rel. ICE-like caspase (Drice)</i>  | Apoptotic process, proteolysis, adult lifespan             |
| GBI_07016-RA | 0.4422 | *  | FBgn0053196 | <i>dumpy (dpy)</i>                          | Transcription factor activity, epithelial/tracheal develop |
| GBI_08544-RB | 0.3989 | *  | No match    |                                             |                                                            |
| GBI_09470-RA | 0.3951 | ** | FBgn0039478 | <i>Nepriylsin 5 (Nep5)</i>                  | Membranes, posttranslational modification                  |
| GBI_01935-RB | 0.3929 | *  | FBgn0012051 | <i>Calpain-A (CalpA)</i>                    | Neuronal cell body, BMP spinal cord patterning             |
| GBI_17696-RA | 0.3765 |    | No match    |                                             |                                                            |
| GBI_05452-RB | 0.3402 |    | FBgn0036877 | CG9452                                      | Acid phosphatase activity, extracellular exosome           |
| GBI_07279-RA | 0.3265 |    | FBgn0025874 | <i>Meiotic central spindle (Meics)</i>      | Transcription/cell division and chromosome partitioning    |
| GBI_11920-RB | 0.31   | *  | FBgn0000083 | <i>Annexin B9 (AnxB9)</i>                   | Cell polarity, wing disc dorsal/ventral pattern formation  |
| GBI_04818-RB | 0.2852 |    | FBgn0051217 | <i>modular serine protease (modSP)</i>      | Autocatalytic cleavage                                     |
| GBI_14462-RA | 0.2756 | *  | No match    |                                             |                                                            |
| GBI_04545-RA | 0.2414 |    | FBgn0012051 | <i>Calpain-A (CalpA)</i>                    | Phagocytosis, adult lifespan, larval locomotory behavior   |
| GBI_12729-RA | 0.2362 |    | FBgn0012037 | <i>Angiotensin converting enzyme (Ance)</i> | Spermatid nucleus differentiation, sperm individualization |
| GBI_11067-RA | 0.2248 |    | FBgn0033250 | CG14762                                     | Axonogenesis, neuron projection morphogenesis              |
| GBI_15926-RA | 0.2248 | ** | FBgn0030778 | CG4678                                      | Peptidase M14, proteolysis, peptide metabolic process      |
| GBI_04544-RA | 0.2013 |    | FBgn0012051 | <i>Calpain-A (CalpA) CalpA</i>              | Phagocytosis, adult lifespan, larval locomotory behavior   |
| GBI_17460-RA | 0.1685 |    | FBgn0038047 | CG5245                                      | Zinc finger, nucleic acid binding                          |
| GBI_01710-RA | 0.1497 |    | FBgn0004638 | <i>downstream of receptor kinase (drk)</i>  | Embryonic development/syncytial blastoderm                 |
| GBI_03557-RA | 0.1337 |    | FBgn0037802 | <i>Sirtuin 6 (Sirt6)</i>                    | Adult lifespan, chromatin silencing,                       |
| GBI_07735-RA | 0.13   |    | FBgn0041713 | <i>yellow-c</i>                             | Melanin biosynthetic process, cuticle pigmentation         |
| GBI_00231-RA | 0.1299 | *  | FBgn0259736 | CG42390                                     | Cell division/chromosome partitioning                      |
| GBI_08685-RA | 0.126  | *  | FBgn0036454 | CG17839                                     | Immunoglobulin subtype 2, Immunoglobulin                   |
| GBI_10295-RA | 0.0921 |    | No match    |                                             |                                                            |
| GBI_15959-RA | 0.0902 |    | FBgn0013348 | <i>Troponin C at 41C (TpnC41C)</i>          | EF-hand domain, calcium-binding site                       |
| GBI_01504-RC | 0.089  |    | FBgn0037665 | Sulfotransferase 2 (St2)                    | Sulfotransferase activity                                  |
| GBI_14634-RB | 0.0721 | *  | FBgn0032979 | <i>Chromatin-linked adaptor (Clamp)</i>     | Zinc finger, nucleic acid binding                          |
| GBI_09694-RB | 0.0652 | ** | FBgn0032768 | CG17564                                     | Domain of unknown function                                 |
| GBI_07712-RA | 0.0492 | *  | FBgn0263025 | CG43320                                     | JmjC domain, cell division and chromosome partitioning     |
| GBI_08082-RA | 0.0489 |    | FBgn0030304 | <i>Cytochrome P450 (Cyp4g15)</i>            | Neural                                                     |
| GBI_11047-RB | 0.0435 | ** | FBgn0264907 | CG44098                                     | Transmembrane transport                                    |
| GBI_07069-RB | 0.043  |    | FBgn0002524 | CG4162                                      | Imaginal disc development, Wnt signaling pathway           |
| GBI_14322-RA | 0.0227 |    | FBgn0243514 | <i>Eater</i>                                | Phagocytosis, scavenger receptor activity                  |
| GBI_00965-RA | 0      | ** | FBgn0034909 | CG4797                                      | Hexose transmembrane transport                             |
| GBI_02270-RA | 0      | ** | FBgn0260439 | <i>Protein phosphatase 2A (Pp2A-29B)</i>    | Protein complex assembly, phagocytosis                     |
| GBI_03078-RA | 0      | *  | FBgn0002789 | <i>Muscle protein 20 (Mp20)</i>             | Actin binding                                              |
| GBI_06961-RA | 0      | *  | FBgn0031800 | CG9497                                      | Integral component of membrane                             |
| GBI_07963-RA | 0      | *  | FBgn0036316 | CG10960                                     | Sugar/inositol transporter, hexose transmembrane transport |
| GBI_14909-RA | 0      | *  | FBgn0038385 | <i>F-box and leucine repeat 7 (Fbxl7)</i>   | Proximal/distal pattern formation, imaginal disc           |
| GBI_15287-RA | 0      |    | FBgn0034267 | CG4984                                      | PMP-22/EMP/MP20/Claudin, membrane                          |

<sup>a</sup>, some gene names are abbreviated.

**Table 2.** Top GO functional groups for testis-biased<sub>TSSB</sub> and ovary-biased<sub>TSSB</sub> genes identified in *G. bimaculatus* (those with orthologs in *G. assimilis*) in Fig 2A. Genes were sex-biased only in the gonads and not in the somatic reproductive system, brain or ventral nerve cords (tissue-specific sex biased, TSSB). The top six clusters with the greatest enrichment (abundance) scores are shown per category. *P*-values are derived from a modified Fisher's test, where lower values indicate greater enrichment. Data is from DAVID software [71] using those *G. bimaculatus* genes with predicted *D. melanogaster* orthologs.

| <b>Ovary-biased genes (N=1,858)</b>      |                | <b>Testis-biased genes (N=1,055)</b>    |                |
|------------------------------------------|----------------|-----------------------------------------|----------------|
| <b>GO Function</b>                       | <b>P-value</b> | <b>GO Function</b>                      | <b>P-value</b> |
| <b>Cluster 1: Enrichment Score 10.31</b> |                | <b>Cluster 1 Enrichment Score: 5.38</b> |                |
| nucleotide-binding                       | 1.00E-15       | ubiquitin-protein transferase activity  | 1.20E-07       |
| ATP-binding                              | 2.00E-14       | <b>Cluster 2 Enrichment Score: 3.66</b> |                |
| <b>Cluster 2: Enrichment Score 7.19</b>  |                | cilium assembly                         | 3.70E-06       |
| WD40/YVTN repeat-like-containing domain  | 7.70E-09       | cilium morphogenesis                    | 6.90E-05       |
| <b>Cluster 3: Enrichment Score 5.41</b>  |                | <b>Cluster 3 Enrichment Score: 3.28</b> |                |
| transcription, DNA-templated             | 5.70E-03       | Nucleotide-binding                      | 2.50E-04       |
| <b>Cluster 4: Enrichment Score 5.03</b>  |                | ATP binding                             | 6.40E-04       |
| zinc-finger                              | 1.30E-05       | <b>Cluster 4 Enrichment Score: 3.19</b> |                |
| <b>Cluster 5: Enrichment Score 4.28</b>  |                | nonmotile primary cilium assembly       | 2.20E-05       |
| ligase                                   | 5.00E-09       | intraciliary retrograde transport       | 3.10E-03       |
| Aminoacyl-tRNA synthetase                | 1.20E-06       | <b>Cluster 5 Enrichment Score: 2.56</b> |                |
| protein biosynthesis                     | 2.50E-02       | mitochondrial inner membrane            | 3.00E-03       |
| <b>Cluster 6: Enrichment Score 3.30</b>  |                | <b>Cluster 6 Enrichment Score: 2.39</b> |                |
| transcription initiation                 | 1.80E-05       | cell projection                         | 1.00E-02       |
| RNA polymerase II transcription cofactor | 1.10E-03       | flagellum                               | 2.60E-02       |

**Table 3.** The *D. melanogaster* seminal fluid proteins (SFPs) [52] that were found to have putative orthologs in *G. bimaculatus* (GB) among the subset of 7,220 genes with intra-*Gryllus* orthologs used for dN/dS analysis. Expression levels (FPKM) for each gene are shown for the three male sexual tissues under study.

| SFP gene in<br><i>D. melanogaster</i> | Gene name or<br>ID | Gene match in <i>G.</i><br><i>bimaculatus</i> * | dN/dS  | Male sexual tissue expression (FPKM) |        |                                     |
|---------------------------------------|--------------------|-------------------------------------------------|--------|--------------------------------------|--------|-------------------------------------|
|                                       |                    |                                                 |        | Accessory<br>glands                  | Testis | Male somatic<br>reproductive system |
| FBgn0034474                           | <i>Obp56g</i>      | GBI_14450-RA                                    | 2.4819 | 41.495                               | 0      | 0.32                                |
| FBgn0028986                           | <i>Spn38F</i>      | GBI_05353-RD                                    | 0.3435 | 0.565                                | 4.13   | 43.58                               |
| FBgn0028987                           | <i>Spn28F</i>      | GBI_00301-RB                                    | 0.2866 | 36.84                                | 270.87 | 94.46                               |
| FBgn0030362                           | <i>regucalcin</i>  | GBI_08029-RA                                    | 0.2496 | 37.63                                | 15.08  | 23.19                               |
| FBgn0030932                           | <i>Ggt-1</i>       | GBI_03406-RA                                    | 0.2302 | 9.845                                | 8.60   | 21.73                               |
| FBgn0038198                           | <i>Npc2b</i>       | GBI_06029-RA                                    | 0.2197 | 7.5                                  | 0.50   | 793.96                              |
| FBgn0283509                           | <i>Phm</i>         | GBI_06121-RA                                    | 0.1496 | 71.82                                | 32.28  | 86.185                              |

**Table 4.** The proportion of genes with sex-biased<sub>TSSB</sub> gonadal expression in *G. bimaculatus* that had dN/dS>1 and their expression breadth (exp. breadth) across tissues (average number of nine tissues with expression >5 FPKM). Only genes with dN/dS>1 and both dN and dS >0 are included.

| Gene category                 | N dN/dS<br>>1 | N Genes | Percent<br>of genes | Chi <sup>2</sup> P <sup>a</sup> | Ave.<br>Exp.<br>breadth | SE   | MWU-<br>test P<br>(exp.<br>breadth) <sup>a</sup> |
|-------------------------------|---------------|---------|---------------------|---------------------------------|-------------------------|------|--------------------------------------------------|
| Ovary-biased <sub>TSSB</sub>  | 19            | 1,858   | 1.02                | a                               | 6.74                    | 0.74 | a                                                |
| Testis-biased <sub>TSSB</sub> | 22            | 1,055   | 2.09                | b                               | 2.73                    | 0.72 | b                                                |
| Universally unbiased          | 66            | 3,449   | 1.91                | b                               | 5.62                    | 0.76 | a                                                |

<sup>a</sup> Different letters in columns with P values indicate a statistically significant difference between categories with P<0.05. SE=standard error.

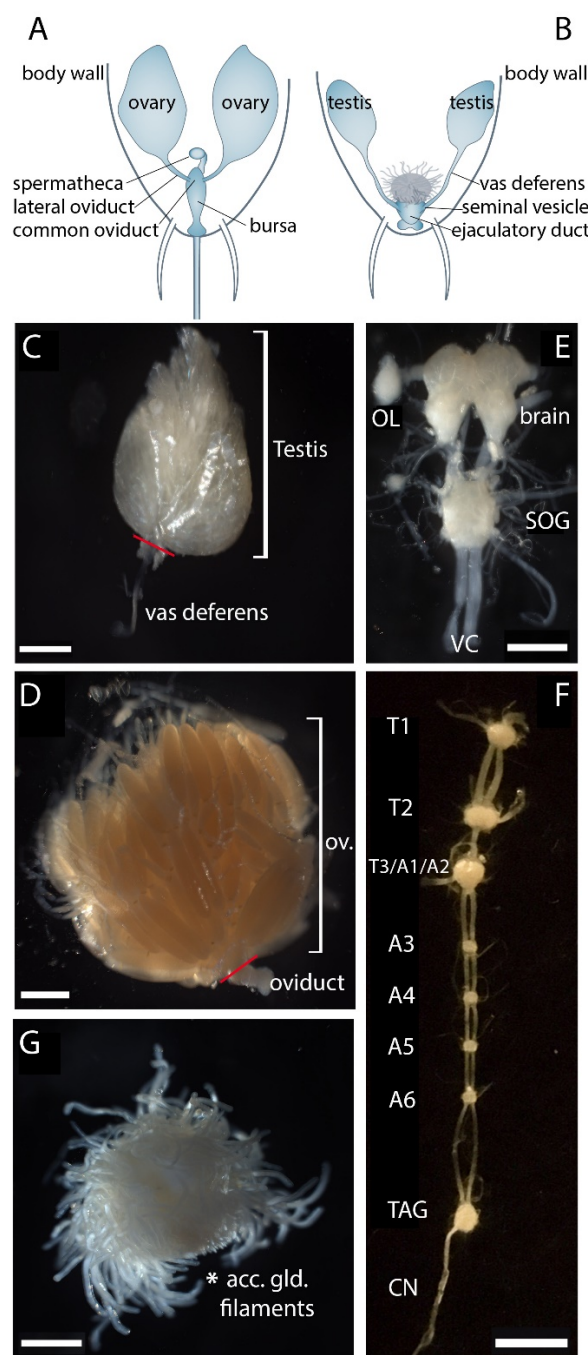

**Fig. 1.** *Gryllus bimaculatus* reproductive and nervous system tissues studied herein. A schematic of the female (A) and male (B) reproductive systems. In A and B, the gonads and the somatic tissues included in the somatic reproductive system under study are indicated. C-G provide micrographs of various tissue types studied herein. C) the testis (one testis shown here; both testes from a given male were used for sampling), including a part of its attached vas deferens (boundary indicated by red line; the vasa deferentia were not included in testis samples). D) the ovary (ov; one ovary shown here; both ovaries from a given female were used for sampling) and an

immediately attached segment of oviduct (boundary indicated by red line; the oviducts were not included in ovary samples). E) the brain, including an optic lobe (OL) (one OL shown here; both OLs from a given individual were included in brain samples). For context, the attached suboesophageal ganglion (SOG) and upper portion of the ventral nerve cord (VC) are also shown; these structures were not included in brain samples. F) the ventral nerve cord including the three thoracic ganglia (T1: prothoracic, T2: mesothoracic, T3/A1/A2: metathoracic ganglion complex), and five abdominal ganglia (A3-A6 and the terminal abdominal ganglion TAG) [123, 124]. The cercal nerve (CN) of one side is also shown. For the ventral nerve cord samples, all tissues in F and the SOG were pooled. G) The male accessory gland consisting of numerous accessory gland filaments (asterisk). Scale bars: 500µm in C and E, 1000µm in D and G, 2500µm in F.

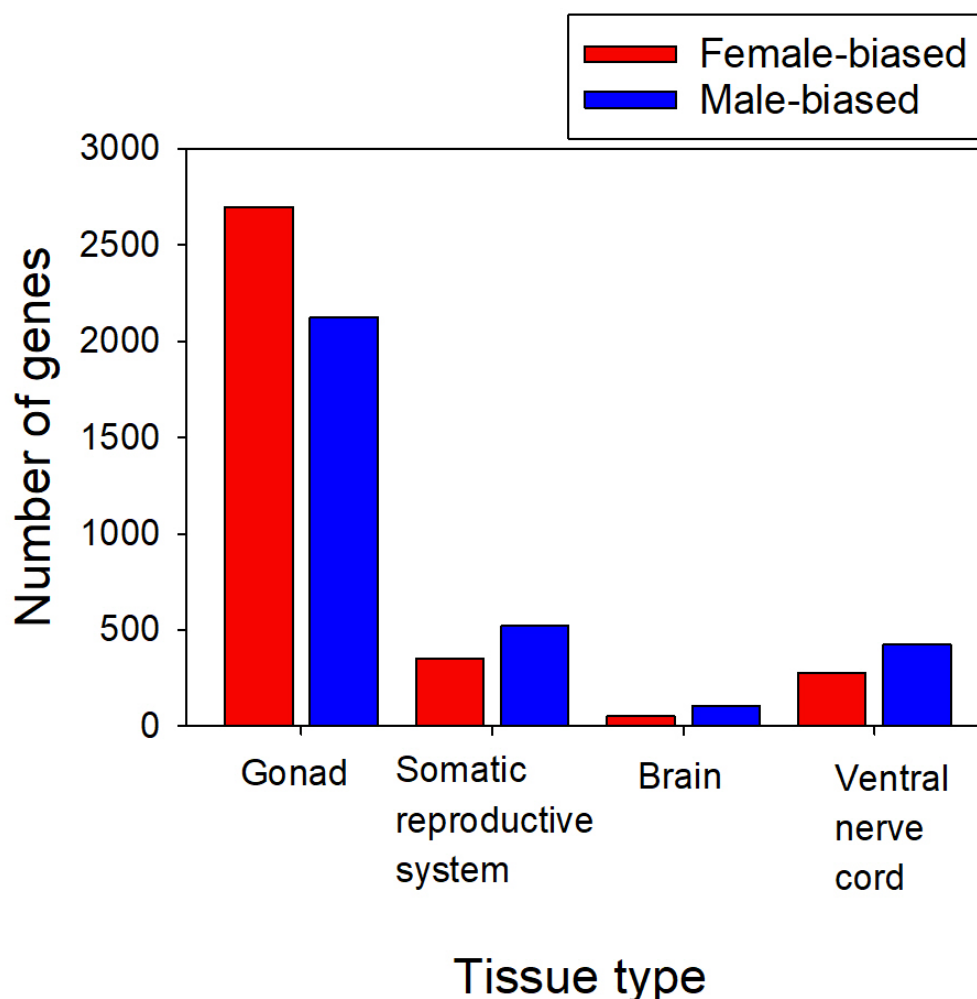

**Fig. 2.** The number of male-biased and female-biased genes identified in the gonad, somatic reproductive system, brain, and ventral nerve cord across all 15,539 *G. bimaculatus* genes under study (sex-biased indicates a two-fold difference in expression and  $P < 0.05$ ). All remaining genes not shown per tissue type had unbiased status as follows: gonad (N=10,717), somatic reproductive system (N=14,666), brain (N=15,382) and ventral nerve cord (N=14,835).

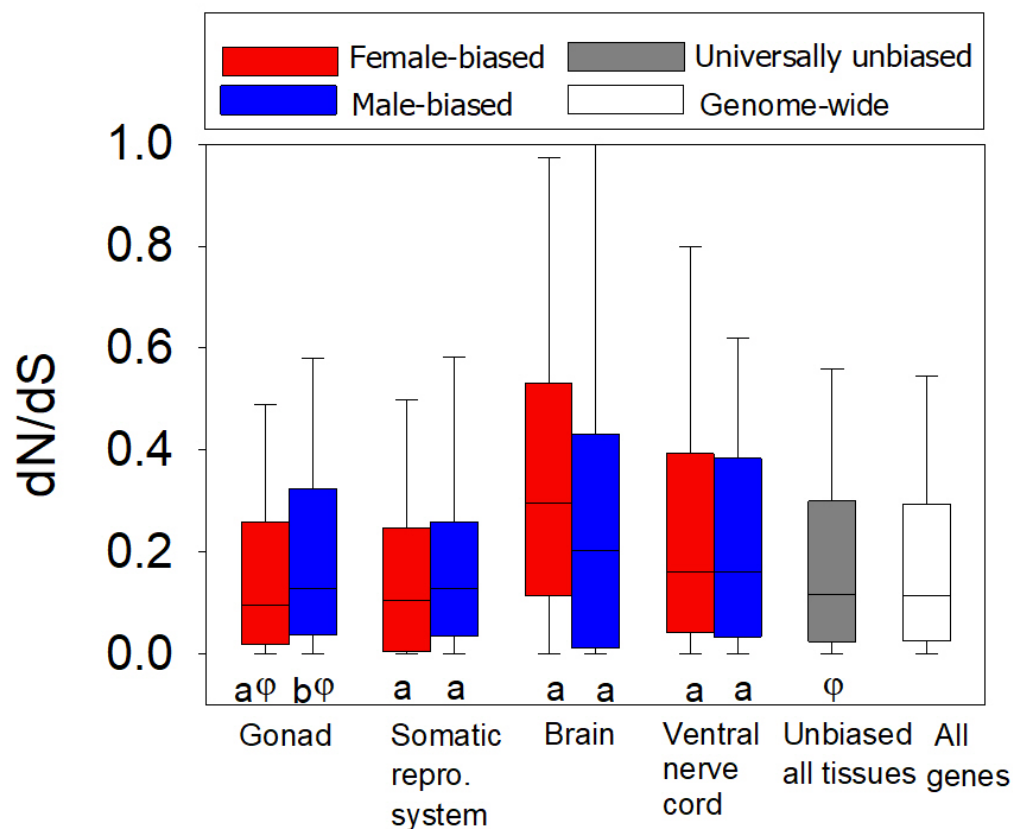

### A. Genes sex-biased only in one tissue type

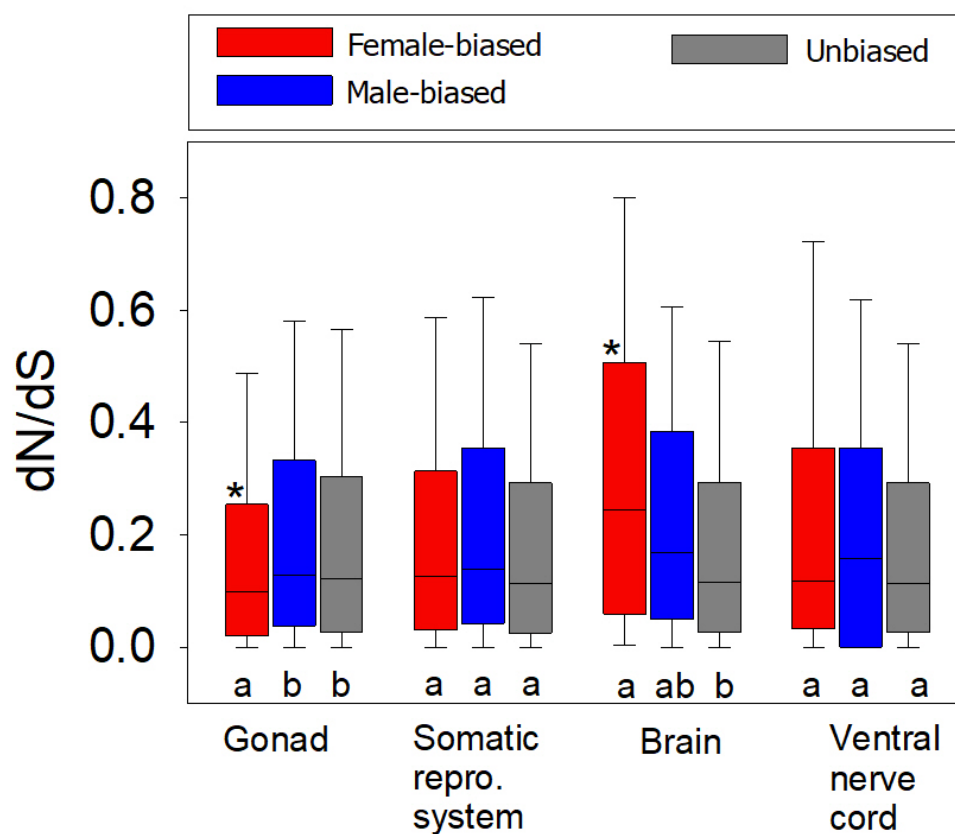

### B. dN/dS and sex-biased status

**Fig. 3.** The dN/dS values of genes with female- or male-biased expression in *G. bimaculatus*. A) Genes with

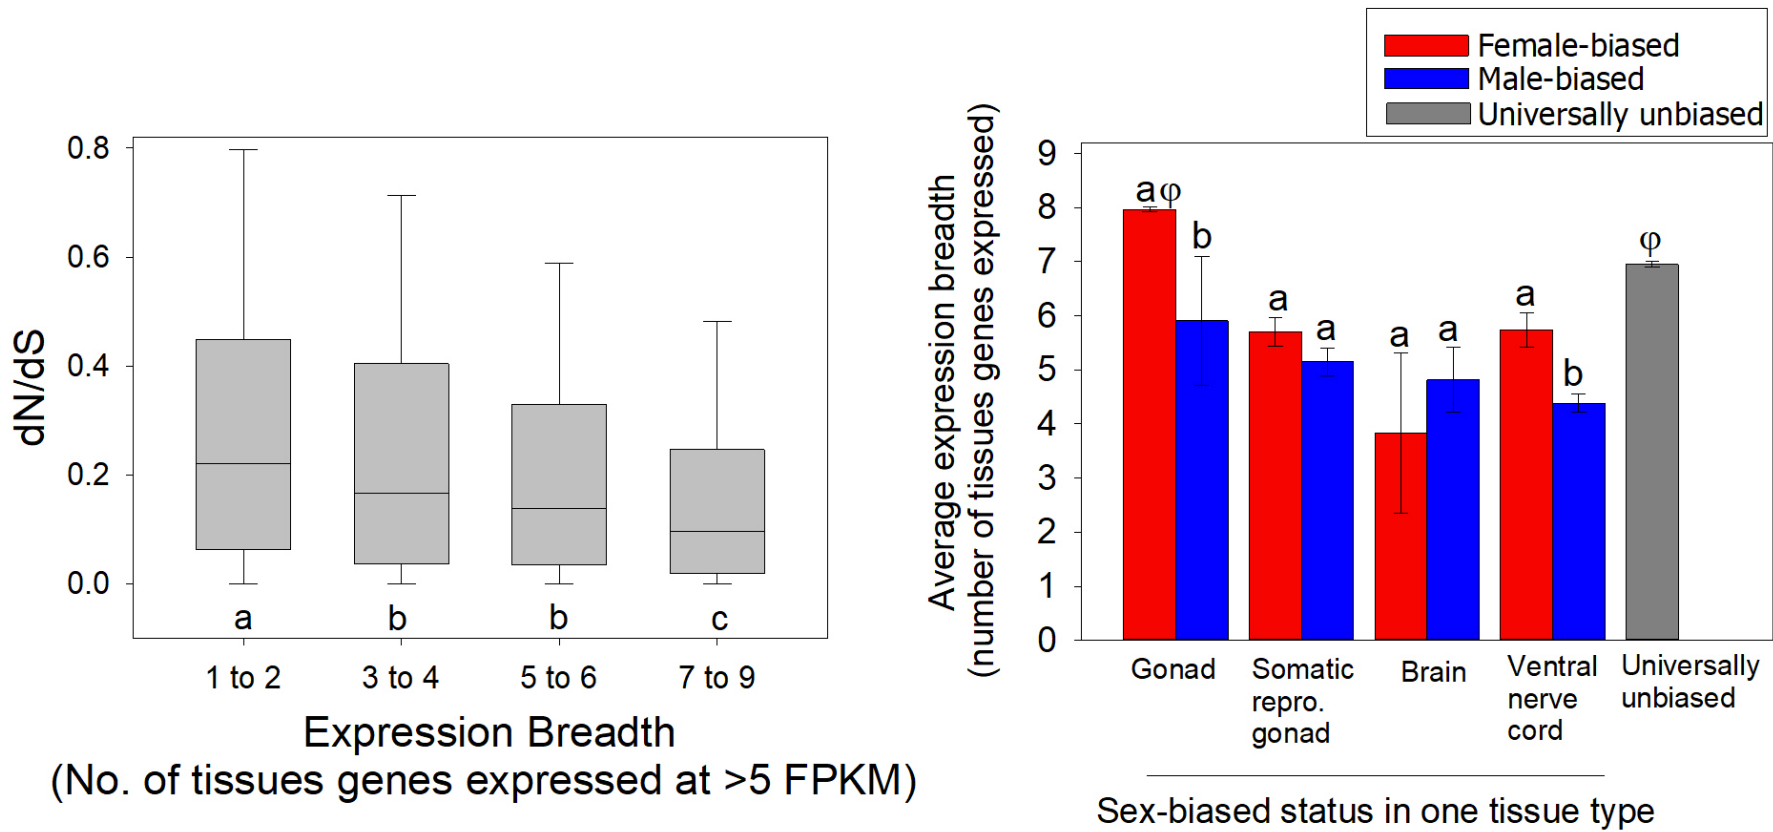

A

B

**Fig. 4.** A) Box and whisker plots of the dN/dS values of genes with respect to their expression breadth, or pleiotropy, for *G. bimaculatus* (N=7,220 genes); B) The expression breadth (average number of tissues with expression of a gene) of genes with female- or male-biased expression in one tissue type only (TSSB, as shown in Fig. 3A). In A, different letters below bars indicate a statistically significant difference using ranked ANOVA with Dunn's paired contrast ( $P < 0.05$ ). In B, different letters in each pair of bars indicate a difference using MWU-tests. φ for ovary-biased and universally unbiased genes indicates a statistically significant difference from each other and from all other bars. Error bars in B indicate standard errors. repro. = reproductive.
